# Supplementary material for: The conservation value of human-modified landscapes for the world’s primates
Source: PubMed Central journal article supplement (PMC6329842; doi:10.1038/s41467-018-08139-0), 2019-01-11
Supplement: 41467_2018_8139_MOESM1_ESM.pdf [file 41467_2018_8139_MOESM1_ESM.pdf]

# **The conservation value of human-modified landscapes for the world's primates**

Galán-Acedo et al.

## **Supplementary Information**

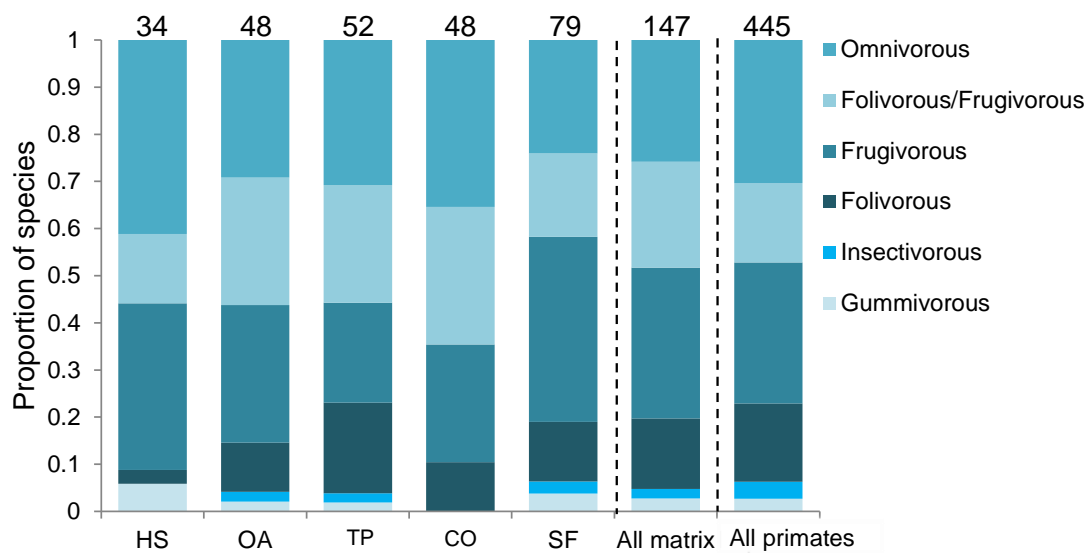

**Supplementary Figure 1.** The proportion (and total number above bars) of primate species within different dietary categories. We tested for differences in frequencies with Chi-square tests of goodness of fit ( $*P \leq 0.05$ ,  $**P \leq 0.01$ ) between primates using the matrix and all the world's primates, by separately assessing primates species that used different matrix types (HS = human settlements, OA = open areas, TP = tree plantations, CO = connectors, and SF = secondary forest). None of the tests were statistically significant. We excluded from the analyses those species for which there was no available information.

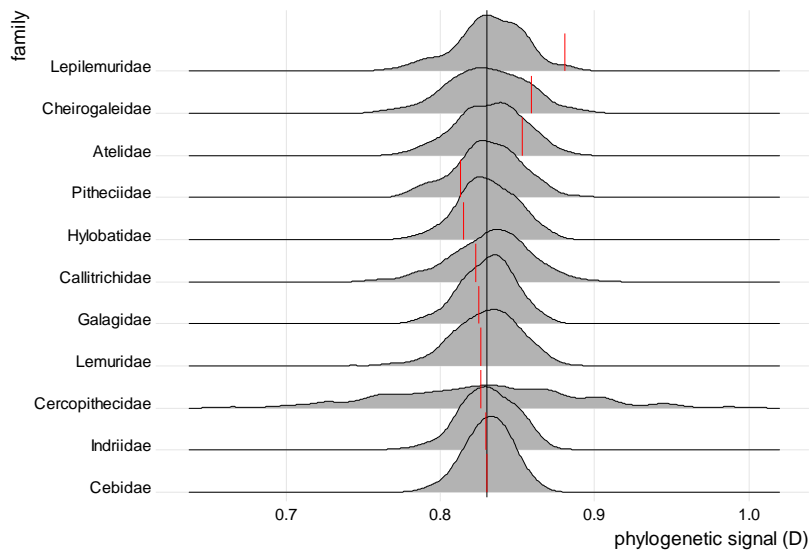

**Supplementary Figure 2. Sensitivity analysis results for phylogenetic signal tests.** Black line shows the estimate of D for the whole order. Red lines are the estimates after removing each family, and gray density plots show the distribution of D values obtained by randomly removing the number of species in the family 500 times.

**Supplementary Note 1.** Despite having a similar number of species in the tree, Lepilemuridae had, as most of the other families, the greatest influence on the parameter estimate when removing it from the analyses. We expected Cercopithecidae to have a large effect on parameter estimates because it includes a larger proportion of the species analyzed. However, the distribution of matrix use within this family is not distinguishable from the order as a whole. After correcting for clade size, only Lepilemuridae had a strong influence on our estimates of  $D$ . Removing this clade from the analysis led to a significant shift in phylogenetic signal towards a truly random pattern.

**Supplementary Table 1. Primate species using the matrix.** The sources of studies reporting the matrix use are included in the Reference column. Matrix: CO = connectors, HS = human settlements, OA = open areas, SF = secondary forests, TP = tree plantations; Realm: M\_Africa = mainland Africa; activity: TR = travel, R = resting, F = foraging, NR = not reported; conservation status (IUCN): CR = critically endangered, EN = endangered, VU = vulnerable, NT = near threatened, LC = least concerned, DD = data deficient, NE = not evaluated; population trend (Pop\_T): I = increasing, D = decreasing, S = stable, NA = no data available; diel activity (D\_A): Di = diurnal, N = Nocturnal, Cath = cathemeral; locomotion: AR = arboreal locomotion, T = terrestrial locomotion; body mass (B\_M): L = large (>10 kg), M = medium (2 – 10 kg), S = small (<2 kg); habitat (forest specialization): FS = forest specialist, N\_FS = non forest specialist; trophic level (T\_L), F\_f = folivorous-frugivorous, Fol = folivorous, Fru = frugivorous, G = gummivorous, O = omnivorous, In = insectivorous. “N records” refers to the number of times that a given primate species was recorded using the matrix.

| Matrix | Family <sup>a</sup>    | Species                         | Realm      | Activity | IUCN | Pop_T | D_A | Locomotion | B_M | Habitat | T_L | N records | Reference |
|--------|------------------------|---------------------------------|------------|----------|------|-------|-----|------------|-----|---------|-----|-----------|-----------|
| HS     | <i>Atelidae</i>        | <i>Alouatta guariba</i>         | Neotropics | TR       | LC   | D     | DI  | AR         | M   | FS      | F_F | 5         | 238       |
| HS     | <i>Callitrichidae</i>  | <i>Callithrix jacchus</i>       | Neotropics | F        | LC   | S     | DI  | AR         | S   | N_FS    | G   | 2         | 243       |
| HS     | <i>Callitrichidae</i>  | <i>Callithrix kuhlii</i>        | Neotropics | F        | NT   | D     | DI  | AR         | S   | FS      | O   | 2         | 210       |
| HS     | <i>Callitrichidae</i>  | <i>Callithrix penicillata</i>   | Neotropics | NR       | LC   | I     | DI  | AR         | S   | N_FS    | G   | 7         | 237       |
| HS     | <i>Callitrichidae</i>  | <i>Callithrix penicillata</i>   | Neotropics | ALL      | LC   | I     | DI  | AR         | S   | N_FS    | G   | 7         | 60        |
| HS     | <i>Callitrichidae</i>  | <i>Callithrix penicillata</i>   | Neotropics | F        | LC   | I     | DI  | AR         | S   | N_FS    | G   | 7         | 243       |
| HS     | <i>Callitrichidae</i>  | <i>Callithrix penicillata</i>   | Neotropics | ALL      | LC   | I     | DI  | AR         | S   | N_FS    | G   | 7         | 59        |
| HS     | <i>Callitrichidae</i>  | <i>Callithrix penicillata</i>   | Neotropics | ALL      | LC   | I     | DI  | AR         | S   | N_FS    | G   | 7         | 61        |
| HS     | <i>Callitrichidae</i>  | <i>Callithrix penicillata</i>   | Neotropics | ALL      | LC   | I     | DI  | AR         | S   | N_FS    | G   | 7         | 97        |
| HS     | <i>Cercopithecidae</i> | <i>Cercocebus torquatus</i>     | M_Africa   | NR       | VU   | D     | DI  | BOTH       | M   | FS      | FRU | 1         | 15        |
| HS     | <i>Cercopithecidae</i> | <i>Cercopithecus ascanius</i>   | M_Africa   | F        | LC   | NI    | DI  | AR         | M   | FS      | FRU | 12        | 94        |
| HS     | <i>Cercopithecidae</i> | <i>Cercopithecus erythrotis</i> | M_Africa   | NR       | VU   | D     | DI  | AR         | M   | FS      | FRU | 1         | 15        |
| HS     | <i>Cercopithecidae</i> | <i>Cercopithecus mona</i>       | M_Africa   | NR       | LC   | NI    | DI  | AR         | M   | FS      | FRU | 2         | 15        |
| HS     | <i>Cercopithecidae</i> | <i>Cercopithecus nictitans</i>  | M_Africa   | NR       | LC   | D     | DI  | AR         | M   | FS      | FRU | 3         | 15        |
| HS     | <i>Cercopithecidae</i> | <i>Cercopithecus pogonias</i>   | M_Africa   | NR       | LC   | D     | DI  | AR         | M   | N_FS    | FRU | 3         | 15        |
| HS     | <i>Cercopithecidae</i> | <i>Cercopithecus sclateri</i>   | M_Africa   | F        | VU   | D     | DI  | AR         | M   | N_FS    | FRU | 1         | 12        |

|    |                        |                                |            |     |    |    |    |      |   |      |     |    |     |
|----|------------------------|--------------------------------|------------|-----|----|----|----|------|---|------|-----|----|-----|
| HS | <i>Cercopithecidae</i> | <i>Chlorocebus aethiops</i>    | M_Africa   | F   | LC | S  | DI | T    | M | N_FS | O   | 12 | 185 |
| HS | <i>Cercopithecidae</i> | <i>Chlorocebus aethiops</i>    | M_Africa   | F   | LC | S  | DI | T    | M | N_FS | O   | 12 | 220 |
| HS | <i>Cercopithecidae</i> | <i>Chlorocebus pygerythrus</i> | M_Africa   | NR  | LC | S  | DI | T    | M | N_FS | O   | 1  | 154 |
| HS | <i>Cercopithecidae</i> | <i>Colobus vellerosus</i>      | M_Africa   | NR  | VU | NI | DI | AR   | M | N_FS | FOL | 1  | 236 |
| HS | <i>Galagidae</i>       | <i>Galago moholi</i>           | M_Africa   | ALL | LC | S  | N  | AR   | S | N_FS | O   | 1  | 222 |
| HS | <i>Callitrichidae</i>  | <i>Leontocebus fuscicollis</i> | Neotropics | F   | LC | D  | DI | AR   | S | FS   | O   | 4  | 249 |
| HS | <i>Cercopithecidae</i> | <i>Macaca cyclopis</i>         | Asia       | F   | LC | S  | DI | BOTH | M | FS   | FRU | 1  | 111 |
| HS | <i>Cercopithecidae</i> | <i>Macaca fascicularis</i>     | Asia       | ALL | LC | D  | DI | AR   | M | FS   | FRU | 10 | 30  |
| HS | <i>Cercopithecidae</i> | <i>Macaca fascicularis</i>     | Asia       | F   | LC | D  | DI | AR   | M | FS   | FRU | 10 | 225 |
| HS | <i>Cercopithecidae</i> | <i>Macaca fascicularis</i>     | Asia       | ALL | LC | D  | DI | AR   | M | FS   | FRU | 10 | 155 |
| HS | <i>Cercopithecidae</i> | <i>Macaca fascicularis</i>     | Asia       | NR  | LC | D  | DI | AR   | M | FS   | FRU | 10 | 82  |
| HS | <i>Cercopithecidae</i> | <i>Macaca fuscata</i>          | Asia       | NR  | LC | S  | DI | BOTH | M | FS   | F_F | 6  | 113 |
| HS | <i>Cercopithecidae</i> | <i>Macaca leonina</i>          | Asia       | ALL | VU | D  | DI | AR   | M | FS   | FRU | 1  | 3   |
| HS | <i>Cercopithecidae</i> | <i>Macaca mulatta</i>          | Asia       | NR  | LC | NI | DI | BOTH | M | N_FS | F_F | 15 | 175 |
| HS | <i>Cercopithecidae</i> | <i>Macaca mulatta</i>          | Asia       | ALL | LC | NI | DI | BOTH | M | N_FS | F_F | 15 | 17  |
| HS | <i>Cercopithecidae</i> | <i>Macaca mulatta</i>          | Asia       | ALL | LC | NI | DI | BOTH | M | N_FS | F_F | 15 | 114 |
| HS | <i>Cercopithecidae</i> | <i>Macaca mulatta</i>          | Asia       | ALL | LC | NI | DI | BOTH | M | N_FS | F_F | 15 | 124 |
| HS | <i>Cercopithecidae</i> | <i>Macaca mulatta</i>          | Asia       | F   | LC | NI | DI | BOTH | M | N_FS | F_F | 15 | 46  |
| HS | <i>Cercopithecidae</i> | <i>Macaca mulatta</i>          | Asia       | NR  | LC | NI | DI | BOTH | M | N_FS | F_F | 15 | 213 |
| HS | <i>Cercopithecidae</i> | <i>Macaca mulatta</i>          | Asia       | F   | LC | NI | DI | BOTH | M | N_FS | F_F | 15 | 45  |
| HS | <i>Cercopithecidae</i> | <i>Macaca mulatta</i>          | Asia       | NR  | LC | NI | DI | BOTH | M | N_FS | F_F | 15 | 233 |
| HS | <i>Cercopithecidae</i> | <i>Macaca mulatta</i>          | Asia       | NR  | LC | NI | DI | BOTH | M | N_FS | F_F | 15 | 231 |
| HS | <i>Cercopithecidae</i> | <i>Macaca mulatta</i>          | Asia       | ALL | LC | NI | DI | BOTH | M | N_FS | F_F | 15 | 85  |
| HS | <i>Cercopithecidae</i> | <i>Macaca mulatta</i>          | Asia       | ALL | LC | NI | DI | BOTH | M | N_FS | F_F | 15 | 147 |
| HS | <i>Cercopithecidae</i> | <i>Macaca mulatta</i>          | Asia       | ALL | LC | NI | DI | BOTH | M | N_FS | F_F | 15 | 232 |
| HS | <i>Cercopithecidae</i> | <i>Macaca mulatta</i>          | Asia       | ALL | LC | NI | DI | BOTH | M | N_FS | F_F | 15 | 195 |
| HS | <i>Cercopithecidae</i> | <i>Macaca mulatta</i>          | Asia       | ALL | LC | NI | DI | BOTH | M | N_FS | F_F | 15 | 125 |
| HS | <i>Cercopithecidae</i> | <i>Macaca mulatta</i>          | Asia       | ALL | LC | NI | DI | BOTH | M | N_FS | F_F | 15 | 102 |
| HS | <i>Cercopithecidae</i> | <i>Macaca radiata</i>          | Asia       | ALL | LC | D  | DI | BOTH | M | N_FS | FRU | 11 | 48  |
| HS | <i>Cercopithecidae</i> | <i>Macaca radiata</i>          | Asia       | ALL | LC | D  | DI | BOTH | M | N_FS | FRU | 11 | 49  |
| HS | <i>Cercopithecidae</i> | <i>Macaca radiata</i>          | Asia       | ALL | LC | D  | DI | BOTH | M | N_FS | FRU | 11 | 47  |

|    |                        |                               |            |     |    |    |    |      |   |      |     |    |     |
|----|------------------------|-------------------------------|------------|-----|----|----|----|------|---|------|-----|----|-----|
| HS | <i>Cercopithecidae</i> | <i>Macaca radiata</i>         | Asia       | ALL | LC | D  | DI | BOTH | M | N_FS | FRU | 11 | 202 |
| HS | <i>Cercopithecidae</i> | <i>Macaca radiata</i>         | Asia       | ALL | LC | D  | DI | BOTH | M | N_FS | FRU | 11 | 228 |
| HS | <i>Cercopithecidae</i> | <i>Macaca sinica</i>          | Asia       | TR  | EN | D  | DI | AR   | M | FS   | FRU | 1  | 63  |
| HS | <i>Cercopithecidae</i> | <i>Macaca sylvanus</i>        | M_Africa   | F   | EN | D  | DI | BOTH | L | N_FS | O   | 2  | 141 |
| HS | <i>Cercopithecidae</i> | <i>Macaca sylvanus</i>        | M_Africa   | NR  | EN | D  | DI | BOTH | L | N_FS | O   | 2  | 82  |
| HS | <i>Cercopithecidae</i> | <i>Mandrillus leucophaeus</i> | M_Africa   | NR  | EN | NI | DI | BOTH | L | N_FS | O   | 1  | 15  |
| HS | <i>Lorisidae</i>       | <i>Nycticebus coucang</i>     | Asia       | R   | VU | D  | N  | AR   | S | FS   | O   | 2  | 70  |
| HS | <i>Hominidae</i>       | <i>Pan troglodytes</i>        | M_Africa   | NR  | EN | D  | DI | BOTH | L | N_FS | O   | 17 | 15  |
| HS | <i>Hominidae</i>       | <i>Pan troglodytes</i>        | M_Africa   | F   | EN | D  | DI | BOTH | L | N_FS | O   | 17 | 62  |
| HS | <i>Cercopithecidae</i> | <i>Papio anubis</i>           | M_Africa   | F   | LC | I  | DI | T    | L | N_FS | O   | 11 | 217 |
| HS | <i>Cercopithecidae</i> | <i>Papio cynocephalus</i>     | M_Africa   | F   | LC | S  | DI | T    | L | N_FS | O   | 3  | 4   |
| HS | <i>Cercopithecidae</i> | <i>Papio ursinus</i>          | M_Africa   | ALL | LC | S  | DI | T    | L | N_FS | O   | 7  | 110 |
| HS | <i>Cercopithecidae</i> | <i>Papio ursinus</i>          | M_Africa   | F   | LC | S  | DI | T    | L | N_FS | O   | 7  | 75  |
| HS | <i>Cercopithecidae</i> | <i>Papio ursinus</i>          | M_Africa   | F   | LC | S  | DI | T    | L | N_FS | O   | 7  | 109 |
| HS | <i>Cercopithecidae</i> | <i>Papio ursinus</i>          | M_Africa   | F   | LC | S  | DI | T    | L | N_FS | O   | 7  | 117 |
| HS | <i>Cercopithecidae</i> | <i>Papio ursinus</i>          | M_Africa   | ALL | LC | S  | DI | T    | L | N_FS | O   | 7  | 108 |
| HS | <i>Cercopithecidae</i> | <i>Ptilocolobus pennantii</i> | M_Africa   | NR  | EN | D  | DI | AR   | M | FS   | F_F | 1  | 15  |
| HS | <i>Callitrichidae</i>  | <i>Saguinus mystax</i>        | Neotropics | F   | LC | S  | DI | AR   | S | FS   | O   | 4  | 249 |
| HS | <i>Cebidae</i>         | <i>Sapajus libidinosus</i>    | Neotropics | ALL | LC | D  | DI | AR   | M | N_FS | O   | 3  | 89  |
| HS | <i>Cercopithecidae</i> | <i>Semnopithecus entellus</i> | Asia       | NR  | LC | D  | DI | T    | L | N_FS | F_F | 8  | 175 |
| HS | <i>Cercopithecidae</i> | <i>Semnopithecus entellus</i> | Asia       | ALL | LC | D  | DI | T    | L | N_FS | F_F | 8  | 247 |
| HS | <i>Cercopithecidae</i> | <i>Semnopithecus entellus</i> | Asia       | NR  | LC | D  | DI | T    | L | N_FS | F_F | 8  | 1   |
| HS | <i>Cercopithecidae</i> | <i>Semnopithecus entellus</i> | Asia       | NR  | LC | D  | DI | T    | L | N_FS | F_F | 8  | 213 |
| HS | <i>Cercopithecidae</i> | <i>Semnopithecus entellus</i> | Asia       | ALL | LC | D  | DI | T    | L | N_FS | F_F | 8  | 180 |
| HS | <i>Cercopithecidae</i> | <i>Semnopithecus entellus</i> | Asia       | ALL | LC | D  | DI | T    | L | N_FS | F_F | 8  | 147 |
| HS | <i>Cercopithecidae</i> | <i>Semnopithecus entellus</i> | Asia       | ALL | LC | D  | DI | T    | L | N_FS | F_F | 8  | 162 |
| OA | <i>Atelidae</i>        | <i>Alouatta caraya</i>        | Neotropics | TR  | LC | D  | DI | AR   | M | N_FS | F_F | 2  | 22  |
| OA | <i>Atelidae</i>        | <i>Alouatta palliata</i>      | Neotropics | F   | LC | NI | DI | AR   | M | FS   | F_F | 25 | 229 |
| OA | <i>Atelidae</i>        | <i>Alouatta palliata</i>      | Neotropics | TR  | LC | NI | DI | AR   | M | FS   | F_F | 25 | 95  |
| OA | <i>Atelidae</i>        | <i>Alouatta pigra</i>         | Neotropics | R   | EN | D  | DI | AR   | M | FS   | F_F | 12 | 198 |
| OA | <i>Atelidae</i>        | <i>Alouatta pigra</i>         | Neotropics | F   | EN | D  | DI | AR   | M | FS   | F_F | 12 | 196 |

|    |                        |                                  |            |    |    |    |    |      |   |      |     |    |     |
|----|------------------------|----------------------------------|------------|----|----|----|----|------|---|------|-----|----|-----|
| OA | <i>Atelidae</i>        | <i>Alouatta pigra</i>            | Neotropics | TR | EN | D  | DI | AR   | M | FS   | F_F | 12 | 18  |
| OA | <i>Atelidae</i>        | <i>Alouatta seniculus</i>        | Neotropics | TR | LC | NI | DI | AR   | M | N_FS | F_F | 7  | 34  |
| OA | <i>Atelidae</i>        | <i>Brachyteles arachnoides</i>   | Neotropics | TR | EN | D  | DI | AR   | M | FS   | F_F | 1  | 132 |
| OA | <i>Atelidae</i>        | <i>Brachyteles hypoxanthus</i>   | Neotropics | TR | CR | D  | DI | AR   | M | FS   | F_F | 1  | 57  |
| OA | <i>Cebidae</i>         | <i>Cebus capucinus</i>           | Neotropics | F  | LC | NI | DI | AR   | M | FS   | O   | 15 | 151 |
| OA | <i>Cebidae</i>         | <i>Cebus capucinus</i>           | Neotropics | F  | LC | NI | DI | AR   | M | FS   | O   | 15 | 229 |
| OA | <i>Cebidae</i>         | <i>Cebus capucinus</i>           | Neotropics | TR | LC | NI | DI | AR   | M | FS   | O   | 15 | 72  |
| OA | <i>Cebidae</i>         | <i>Cebus capucinus</i>           | Neotropics | TR | LC | NI | DI | AR   | M | FS   | O   | 15 | 41  |
| OA | <i>Cebidae</i>         | <i>Cebus capucinus</i>           | Neotropics | F  | LC | NI | DI | AR   | M | FS   | O   | 15 | 96  |
| OA | <i>Cercopithecidae</i> | <i>Cercocebus galeritus</i>      | M_Africa   | F  | EN | D  | DI | BOTH | M | FS   | FRU | 3  | 164 |
| OA | <i>Cercopithecidae</i> | <i>Cercopithecus ascanius</i>    | M_Africa   | F  | LC | NI | DI | AR   | M | FS   | FRU | 12 | 248 |
| OA | <i>Cercopithecidae</i> | <i>Cercopithecus ascanius</i>    | M_Africa   | F  | LC | NI | DI | AR   | M | FS   | FRU | 12 | 192 |
| OA | <i>Cercopithecidae</i> | <i>Cercopithecus ascanius</i>    | M_Africa   | F  | LC | NI | DI | AR   | M | FS   | FRU | 12 | 168 |
| OA | <i>Cercopithecidae</i> | <i>Cercopithecus ascanius</i>    | M_Africa   | F  | LC | NI | DI | AR   | M | FS   | FRU | 12 | 83  |
| OA | <i>Cercopithecidae</i> | <i>Cercopithecus campbelli</i>   | M_Africa   | F  | LC | NI | DI | AR   | M | N_FS | FRU | 5  | 250 |
| OA | <i>Cercopithecidae</i> | <i>Cercopithecus cephus</i>      | M_Africa   | NR | LC | NI | DI | AR   | M | FS   | FRU | 2  | 146 |
| OA | <i>Cercopithecidae</i> | <i>Cercopithecus mitis</i>       | M_Africa   | F  | LC | D  | DI | AR   | M | FS   | O   | 10 | 248 |
| OA | <i>Cercopithecidae</i> | <i>Cercopithecus mitis</i>       | M_Africa   | F  | LC | D  | DI | AR   | M | FS   | O   | 10 | 28  |
| OA | <i>Cercopithecidae</i> | <i>Cercopithecus mitis</i>       | M_Africa   | F  | LC | D  | DI | AR   | M | FS   | O   | 10 | 164 |
| OA | <i>Cercopithecidae</i> | <i>Cercopithecus mitis</i>       | M_Africa   | F  | LC | D  | DI | AR   | M | FS   | O   | 10 | 178 |
| OA | <i>Cercopithecidae</i> | <i>Cercopithecus mona</i>        | M_Africa   | NR | LC | NI | DI | AR   | M | FS   | FRU | 2  | 146 |
| OA | <i>Cercopithecidae</i> | <i>Cercopithecus nictitans</i>   | M_Africa   | NR | LC | D  | DI | AR   | M | FS   | FRU | 3  | 146 |
| OA | <i>Cercopithecidae</i> | <i>Chlorocebus aethiops</i>      | M_Africa   | F  | LC | S  | DI | T    | M | N_FS | O   | 12 | 248 |
| OA | <i>Cercopithecidae</i> | <i>Chlorocebus aethiops</i>      | M_Africa   | F  | LC | S  | DI | T    | M | N_FS | O   | 12 | 25  |
| OA | <i>Cercopithecidae</i> | <i>Chlorocebus aethiops</i>      | M_Africa   | F  | LC | S  | DI | T    | M | N_FS | O   | 12 | 220 |
| OA | <i>Cercopithecidae</i> | <i>Chlorocebus aethiops</i>      | M_Africa   | F  | LC | S  | DI | T    | M | N_FS | O   | 12 | 164 |
| OA | <i>Cercopithecidae</i> | <i>Chlorocebus aethiops</i>      | M_Africa   | F  | LC | S  | DI | T    | M | N_FS | O   | 12 | 120 |
| OA | <i>Cercopithecidae</i> | <i>Chlorocebus djamdjamensis</i> | M_Africa   | F  | VU | D  | DI | BOTH | M | FS   | FOL | 1  | 156 |
| OA | <i>Cercopithecidae</i> | <i>Colobus angolensis</i>        | M_Africa   | TR | LC | NI | DI | AR   | M | FS   | FOL | 5  | 6   |
| OA | <i>Lemuridae</i>       | <i>Lemur catta</i>               | Madagascar | F  | EN | D  | DI | BOTH | M | N_FS | F_F | 1  | 128 |
| OA | <i>Cercopithecidae</i> | <i>Lophocebus ugandae</i>        | M_Africa   | F  | NE | NI | DI | AR   | M | FS   | F_F | 2  | 83  |



|    |                        |                             |          |     |    |    |    |      |   |      |     |    |     |
|----|------------------------|-----------------------------|----------|-----|----|----|----|------|---|------|-----|----|-----|
| OA | <i>Cercopithecidae</i> | <i>Macaca assamensis</i>    | Asia     | F   | NT | D  | DI | AR   | M | FS   | FRU | 1  | 207 |
| OA | <i>Cercopithecidae</i> | <i>Macaca fascicularis</i>  | Asia     | F   | LC | D  | DI | AR   | M | FS   | FRU | 10 | 143 |
| OA | <i>Cercopithecidae</i> | <i>Macaca fuscata</i>       | Asia     | R   | LC | S  | DI | BOTH | M | FS   | F_F | 6  | 64  |
| OA | <i>Cercopithecidae</i> | <i>Macaca fuscata</i>       | Asia     | F   | LC | S  | DI | BOTH | M | FS   | F_F | 6  | 256 |
| OA | <i>Cercopithecidae</i> | <i>Macaca fuscata</i>       | Asia     | ALL | LC | S  | DI | BOTH | M | FS   | F_F | 6  | 112 |
| OA | <i>Cercopithecidae</i> | <i>Macaca nemestrina</i>    | Asia     | F   | VU | D  | DI | T    | M | FS   | FRU | 4  | 143 |
| OA | <i>Cercopithecidae</i> | <i>Macaca ochreata</i>      | Asia     | F   | VU | D  | DI | BOTH | M | FS   | FRU | 3  | 199 |
| OA | <i>Cercopithecidae</i> | <i>Macaca ochreata</i>      | Asia     | F   | VU | D  | DI | BOTH | M | FS   | FRU | 3  | 200 |
| OA | <i>Cercopithecidae</i> | <i>Macaca radiata</i>       | Asia     | F   | LC | D  | DI | BOTH | M | N_FS | FRU | 11 | 226 |
| OA | <i>Cercopithecidae</i> | <i>Macaca radiata</i>       | Asia     | F   | LC | D  | DI | BOTH | M | N_FS | FRU | 11 | 227 |
| OA | <i>Cercopithecidae</i> | <i>Macaca tonkeana</i>      | Asia     | F   | VU | D  | DI | BOTH | L | FS   | FRU | 1  | 208 |
| OA | <i>Cercopithecidae</i> | <i>Miopithecus talapoin</i> | M_Africa | NR  | LC | NI | DI | BOTH | S | FS   | O   | 2  | 146 |
| OA | <i>Lorisidae</i>       | <i>Nycticebus javanicus</i> | Asia     | NR  | CR | D  | N  | AR   | S | FS   | G   | 2  | 245 |
| OA | <i>Hominidae</i>       | <i>Pan troglodytes</i>      | M_Africa | F   | EN | D  | DI | BOTH | L | N_FS | O   | 17 | 36  |
| OA | <i>Hominidae</i>       | <i>Pan troglodytes</i>      | M_Africa | F   | EN | D  | DI | BOTH | L | N_FS | O   | 17 | 107 |
| OA | <i>Hominidae</i>       | <i>Pan troglodytes</i>      | M_Africa | F   | EN | D  | DI | BOTH | L | N_FS | O   | 17 | 192 |
| OA | <i>Hominidae</i>       | <i>Pan troglodytes</i>      | M_Africa | F   | EN | D  | DI | BOTH | L | N_FS | O   | 17 | 168 |
| OA | <i>Hominidae</i>       | <i>Pan troglodytes</i>      | M_Africa | ALL | EN | D  | DI | BOTH | L | N_FS | O   | 17 | 241 |
| OA | <i>Hominidae</i>       | <i>Pan troglodytes</i>      | M_Africa | F   | EN | D  | DI | BOTH | L | N_FS | O   | 17 | 20  |
| OA | <i>Hominidae</i>       | <i>Pan troglodytes</i>      | M_Africa | F   | EN | D  | DI | BOTH | L | N_FS | O   | 17 | 105 |
| OA | <i>Cercopithecidae</i> | <i>Papio anubis</i>         | M_Africa | F   | LC | I  | DI | T    | L | N_FS | O   | 11 | 131 |
| OA | <i>Cercopithecidae</i> | <i>Papio anubis</i>         | M_Africa | F   | LC | I  | DI | T    | L | N_FS | O   | 11 | 248 |
| OA | <i>Cercopithecidae</i> | <i>Papio anubis</i>         | M_Africa | ALL | LC | I  | DI | T    | L | N_FS | O   | 11 | 241 |
| OA | <i>Cercopithecidae</i> | <i>Papio anubis</i>         | M_Africa | NR  | LC | I  | DI | T    | L | N_FS | O   | 11 | 218 |
| OA | <i>Cercopithecidae</i> | <i>Papio anubis</i>         | M_Africa | F   | LC | I  | DI | T    | L | N_FS | O   | 11 | 164 |
| OA | <i>Cercopithecidae</i> | <i>Papio anubis</i>         | M_Africa | F   | LC | I  | DI | T    | L | N_FS | O   | 11 | 105 |
| OA | <i>Cercopithecidae</i> | <i>Papio cynocephalus</i>   | M_Africa | F   | LC | S  | DI | T    | L | N_FS | O   | 3  | 192 |
| OA | <i>Cercopithecidae</i> | <i>Papio cynocephalus</i>   | M_Africa | F   | LC | S  | DI | T    | L | N_FS | O   | 3  | 168 |
| OA | <i>Cercopithecidae</i> | <i>Papio hamadryas</i>      | M_Africa | F   | LC | I  | DI | T    | L | N_FS | O   | 4  | 106 |
| OA | <i>Cercopithecidae</i> | <i>Papio hamadryas</i>      | M_Africa | TR  | LC | I  | DI | T    | L | N_FS | O   | 4  | 187 |
| OA | <i>Cercopithecidae</i> | <i>Papio ursinus</i>        | M_Africa | ALL | LC | S  | DI | T    | L | N_FS | O   | 7  | 108 |

|    |                        |                                |            |     |    |    |    |    |   |      |     |    |     |
|----|------------------------|--------------------------------|------------|-----|----|----|----|----|---|------|-----|----|-----|
| OA | <i>Cercopithecidae</i> | <i>Piliocolobus badius</i>     | M_Africa   | TR  | EN | D  | DI | AR | M | FS   | F_F | 5  | 93  |
| OA | <i>Pitheciidae</i>     | <i>Plecturocebus modestus</i>  | Neotropics | TR  | EN | D  | DI | AR | S | N_FS | FRU | 1  | 76  |
| OA | <i>Pitheciidae</i>     | <i>Plecturocebus Moloch</i>    | Neotropics | TR  | LC | NI | DI | AR | S | FS   | O   | 2  | 77  |
| OA | <i>Pitheciidae</i>     | <i>Plecturocebus olallae</i>   | Neotropics | TR  | EN | D  | DI | AR | S | N_FS | F_F | 2  | 76  |
| OA | <i>Cercopithecidae</i> | <i>Presbytis thomasi</i>       | Asia       | F   | VU | D  | DI | AR | M | FS   | F_F | 2  | 143 |
| OA | <i>Indriidae</i>       | <i>Propithecus verreauxi</i>   | Madagascar | F   | EN | D  | DI | AR | M | N_FS | F_F | 4  | 86  |
| OA | <i>Cercopithecidae</i> | <i>Rungwecebus kipunji</i>     | M_Africa   | F   | CR | D  | DI | AR | L | FS   | O   | 2  | 28  |
| OA | <i>Callitrichidae</i>  | <i>Saguinus leucopus</i>       | Neotropics | TR  | EN | D  | DI | AR | S | FS   | FRU | 7  | 53  |
| OA | <i>Callitrichidae</i>  | <i>Saguinus leucopus</i>       | Neotropics | TR  | EN | D  | DI | AR | S | FS   | FRU | 7  | 127 |
| OA | <i>Cebidae</i>         | <i>Saimiri sciureus</i>        | Neotropics | TR  | LC | D  | DI | AR | S | FS   | O   | 3  | 34  |
| OA | <i>Cebidae</i>         | <i>Sapajus apella</i>          | Neotropics | F   | LC | D  | DI | AR | M | N_FS | O   | 11 | 190 |
| OA | <i>Cebidae</i>         | <i>Sapajus apella</i>          | Neotropics | TR  | LC | D  | DI | AR | M | N_FS | O   | 11 | 34  |
| OA | <i>Cebidae</i>         | <i>Sapajus libidinosus</i>     | Neotropics | F   | LC | D  | DI | AR | M | N_FS | O   | 3  | 81  |
| OA | <i>Tarsiidae</i>       | <i>Tarsius dentatus</i>        | Asia       | TR  | VU | D  | N  | AR | S | FS   | IN  | 3  | 158 |
| OA | <i>Cercopithecidae</i> | <i>Theropithecus gelada</i>    | M_Africa   | TR  | LC | D  | DI | T  | L | N_FS | FOL | 1  | 121 |
| OA | <i>Cercopithecidae</i> | <i>Trachypithecus germaini</i> | Asia       | F   | EN | D  | DI | AR | M | FS   | FOL | 2  | 143 |
| OA | <i>Cercopithecidae</i> | <i>Trachypithecus pileatus</i> | Asia       | NR  | VU | D  | DI | AR | L | FS   | FOL | 1  | 219 |
| TP | <i>Atelidae</i>        | <i>Alouatta palliata</i>       | Neotropics | ALL | LC | NI | DI | AR | M | FS   | F_F | 25 | 253 |
| TP | <i>Atelidae</i>        | <i>Alouatta palliata</i>       | Neotropics | ALL | LC | NI | DI | AR | M | FS   | F_F | 25 | 165 |
| TP | <i>Atelidae</i>        | <i>Alouatta palliata</i>       | Neotropics | ALL | LC | NI | DI | AR | M | FS   | F_F | 25 | 149 |
| TP | <i>Atelidae</i>        | <i>Alouatta palliata</i>       | Neotropics | ALL | LC | NI | DI | AR | M | FS   | F_F | 25 | 68  |
| TP | <i>Atelidae</i>        | <i>Alouatta palliata</i>       | Neotropics | NR  | LC | NI | DI | AR | M | FS   | F_F | 25 | 69  |
| TP | <i>Atelidae</i>        | <i>Alouatta palliata</i>       | Neotropics | F   | LC | NI | DI | AR | M | FS   | F_F | 25 | 69  |
| TP | <i>Atelidae</i>        | <i>Alouatta pigra</i>          | Neotropics | F   | EN | D  | DI | AR | M | FS   | F_F | 12 | 258 |
| TP | <i>Atelidae</i>        | <i>Alouatta pigra</i>          | Neotropics | ALL | EN | D  | DI | AR | M | FS   | F_F | 12 | 198 |
| TP | <i>Atelidae</i>        | <i>Alouatta pigra</i>          | Neotropics | ALL | EN | D  | DI | AR | M | FS   | F_F | 12 | 197 |
| TP | <i>Atelidae</i>        | <i>Alouatta pigra</i>          | Neotropics | NR  | EN | D  | DI | AR | M | FS   | F_F | 12 | 69  |
| TP | <i>Aotidae</i>         | <i>Aotus lemurinus</i>         | Neotropics | F   | VU | D  | N  | AR | S | FS   | O   | 2  | 100 |
| TP | <i>Atelidae</i>        | <i>Ateles geoffroyi</i>        | Neotropics | NR  | EN | D  | DI | AR | M | FS   | FRU | 19 | 68  |
| TP | <i>Atelidae</i>        | <i>Ateles geoffroyi</i>        | Neotropics | ALL | EN | D  | DI | AR | M | FS   | FRU | 19 | 69  |
| TP | <i>Indriidae</i>       | <i>Avahi laniger</i>           | Madagascar | F   | VU | D  | N  | AR | S | FS   | FOL | 2  | 86  |

|    |                        |                                   |            |     |    |    |      |      |   |      |     |    |     |
|----|------------------------|-----------------------------------|------------|-----|----|----|------|------|---|------|-----|----|-----|
| TP | <i>Callitrichidae</i>  | <i>Callithrix kuhlii</i>          | Neotropics | ALL | NT | D  | DI   | AR   | S | FS   | O   | 2  | 240 |
| TP | <i>Cebidae</i>         | <i>Cebus capucinus</i>            | Neotropics | F   | LC | NI | DI   | AR   | M | FS   | O   | 15 | 151 |
| TP | <i>Cebidae</i>         | <i>Cebus capucinus</i>            | Neotropics | NR  | LC | NI | DI   | AR   | M | FS   | O   | 15 | 69  |
| TP | <i>Cercopithecidae</i> | <i>Cercocebus galeritus</i>       | M_Africa   | F   | EN | D  | DI   | BOTH | M | FS   | FRU | 3  | 164 |
| TP | <i>Cercopithecidae</i> | <i>Cercopithecus ascanius</i>     | M_Africa   | F   | LC | NI | DI   | AR   | M | FS   | FRU | 12 | 13  |
| TP | <i>Cercopithecidae</i> | <i>Cercopithecus ascanius</i>     | M_Africa   | F   | LC | NI | DI   | AR   | M | FS   | FRU | 12 | 83  |
| TP | <i>Cercopithecidae</i> | <i>Cercopithecus campbelli</i>    | M_Africa   | F   | LC | NI | DI   | AR   | M | N_FS | FRU | 5  | 250 |
| TP | <i>Cercopithecidae</i> | <i>Cercopithecus mitis</i>        | M_Africa   | F   | LC | D  | DI   | AR   | M | FS   | O   | 10 | 164 |
| TP | <i>Cercopithecidae</i> | <i>Cercopithecus mitis</i>        | M_Africa   | F   | LC | D  | DI   | AR   | M | FS   | O   | 10 | 178 |
| TP | <i>Cheirogaleidae</i>  | <i>Cheirogaleus major</i>         | Madagascar | ALL | DD | D  | N    | AR   | S | FS   | F_F | 2  | 86  |
| TP | <i>Cercopithecidae</i> | <i>Chlorocebus aethiops</i>       | M_Africa   | F   | LC | S  | DI   | T    | M | N_FS | O   | 12 | 25  |
| TP | <i>Cercopithecidae</i> | <i>Chlorocebus aethiops</i>       | M_Africa   | F   | LC | S  | DI   | T    | M | N_FS | O   | 12 | 220 |
| TP | <i>Cercopithecidae</i> | <i>Chlorocebus aethiops</i>       | M_Africa   | F   | LC | S  | DI   | T    | M | N_FS | O   | 12 | 164 |
| TP | <i>Cercopithecidae</i> | <i>Chlorocebus aethiops</i>       | M_Africa   | F   | LC | S  | DI   | T    | M | N_FS | O   | 12 | 120 |
| TP | <i>Cercopithecidae</i> | <i>Colobus angolensis</i>         | M_Africa   | ALL | LC | NI | DI   | AR   | M | FS   | FOL | 5  | 6   |
| TP | <i>Cercopithecidae</i> | <i>Colobus angolensis</i>         | M_Africa   | F   | LC | NI | DI   | AR   | M | FS   | FOL | 5  | 7   |
| TP | <i>Lemuridae</i>       | <i>Eulemur fulvus</i>             | Madagascar | ALL | NT | D  | CATH | AR   | M | FS   | F_F | 2  | 86  |
| TP | <i>Lemuridae</i>       | <i>Hapalemur griseus</i>          | Madagascar | F   | VU | D  | DI   | AR   | S | FS   | FOL | 2  | 86  |
| TP | <i>Hylobatidae</i>     | <i>Hylobates lar</i>              | Asia       | NR  | EN | D  | DI   | AR   | M | FS   | FRU | 2  | 11  |
| TP | <i>Indriidae</i>       | <i>Indri indri</i>                | Madagascar | TR  | CR | D  | DI   | AR   | M | FS   | FOL | 1  | 86  |
| TP | <i>Callitrichidae</i>  | <i>Leontopithecus chrysomelas</i> | Neotropics | ALL | EN | D  | DI   | AR   | S | FS   | O   | 4  | 176 |
| TP | <i>Callitrichidae</i>  | <i>Leontopithecus chrysomelas</i> | Neotropics | ALL | EN | D  | DI   | AR   | S | FS   | O   | 4  | 177 |
| TP | <i>Callitrichidae</i>  | <i>Leontopithecus chrysomelas</i> | Neotropics | ALL | EN | D  | DI   | AR   | S | FS   | O   | 4  | 240 |
| TP | <i>Lepilemuridae</i>   | <i>Lepilemur mustelinus</i>       | Madagascar | ALL | NT | D  | N    | AR   | S | FS   | FOL | 1  | 86  |
| TP | <i>Cercopithecidae</i> | <i>Lophocebus ugandae</i>         | M_Africa   | F   | NE | NI | DI   | AR   | M | FS   | F_F | 2  | 83  |
| TP | <i>Cercopithecidae</i> | <i>Macaca fascicularis</i>        | Asia       | NR  | LC | D  | DI   | AR   | M | FS   | FRU | 10 | 167 |
| TP | <i>Cercopithecidae</i> | <i>Macaca fascicularis</i>        | Asia       | NR  | LC | D  | DI   | AR   | M | FS   | FRU | 10 | 11  |
| TP | <i>Cercopithecidae</i> | <i>Macaca fascicularis</i>        | Asia       | F   | LC | D  | DI   | AR   | M | FS   | FRU | 10 | 143 |
| TP | <i>Cercopithecidae</i> | <i>Macaca fuscata</i>             | Asia       | F   | LC | S  | DI   | BOTH | M | FS   | F_F | 6  | 256 |
| TP | <i>Cercopithecidae</i> | <i>Macaca fuscata</i>             | Asia       | F   | LC | S  | DI   | BOTH | M | FS   | F_F | 6  | 221 |
| TP | <i>Cercopithecidae</i> | <i>Macaca nemestrina</i>          | Asia       | NR  | VU | D  | DI   | T    | M | FS   | FRU | 4  | 11  |

|    |                        |                                 |            |     |    |   |    |      |   |      |     |    |     |
|----|------------------------|---------------------------------|------------|-----|----|---|----|------|---|------|-----|----|-----|
| TP | <i>Cercopithecidae</i> | <i>Macaca nemestrina</i>        | Asia       | F   | VU | D | DI | T    | M | FS   | FRU | 4  | 143 |
| TP | <i>Cercopithecidae</i> | <i>Macaca ochreata</i>          | Asia       | F   | VU | D | DI | BOTH | M | FS   | FRU | 3  | 200 |
| TP | <i>Cercopithecidae</i> | <i>Macaca radiata</i>           | Asia       | NR  | LC | D | DI | BOTH | M | N_FS | FRU | 11 | 119 |
| TP | <i>Cercopithecidae</i> | <i>Macaca radiata</i>           | Asia       | F   | LC | D | DI | BOTH | M | N_FS | FRU | 11 | 226 |
| TP | <i>Cercopithecidae</i> | <i>Macaca radiata</i>           | Asia       | F   | LC | D | DI | BOTH | M | N_FS | FRU | 11 | 227 |
| TP | <i>Cercopithecidae</i> | <i>Macaca radiata</i>           | Asia       | F   | LC | D | DI | BOTH | M | N_FS | FRU | 11 | 21  |
| TP | <i>Cheirogaleidae</i>  | <i>Microcebus murinus</i>       | Madagascar | NR  | LC | D | N  | AR   | S | N_FS | O   | 3  | 8   |
| TP | <i>Cheirogaleidae</i>  | <i>Microcebus rufus</i>         | Madagascar | R   | VU | D | N  | AR   | S | FS   | O   | 1  | 86  |
| TP | <i>Cercopithecidae</i> | <i>Nasalis larvatus</i>         | Asia       | TR  | EN | D | DI | AR   | L | FS   | F_F | 1  | 23  |
| TP | <i>Lorisidae</i>       | <i>Nycticebus coucang</i>       | Asia       | NR  | VU | D | N  | AR   | S | FS   | O   | 2  | 11  |
| TP | <i>Lorisidae</i>       | <i>Nycticebus javanicus</i>     | Asia       | NR  | CR | D | N  | AR   | S | FS   | G   | 2  | 245 |
| TP | <i>Hominidae</i>       | <i>Pan troglodytes</i>          | M_Africa   | ALL | EN | D | DI | BOTH | L | N_FS | O   | 17 | 241 |
| TP | <i>Hominidae</i>       | <i>Pan troglodytes</i>          | M_Africa   | F   | EN | D | DI | BOTH | L | N_FS | O   | 17 | 20  |
| TP | <i>Hominidae</i>       | <i>Pan troglodytes</i>          | M_Africa   | F   | EN | D | DI | BOTH | L | N_FS | O   | 17 | 37  |
| TP | <i>Hominidae</i>       | <i>Pan troglodytes</i>          | M_Africa   | F   | EN | D | DI | BOTH | L | N_FS | O   | 17 | 101 |
| TP | <i>Cercopithecidae</i> | <i>Papio anubis</i>             | M_Africa   | ALL | LC | I | DI | T    | L | N_FS | O   | 11 | 241 |
| TP | <i>Cercopithecidae</i> | <i>Papio anubis</i>             | M_Africa   | F   | LC | I | DI | T    | L | N_FS | O   | 11 | 164 |
| TP | <i>Cercopithecidae</i> | <i>Papio hamadryas</i>          | M_Africa   | F   | LC | I | DI | T    | L | N_FS | O   | 4  | 104 |
| TP | <i>Cercopithecidae</i> | <i>Papio ursinus</i>            | M_Africa   | ALL | LC | S | DI | T    | L | N_FS | O   | 7  | 108 |
| TP | <i>Cercopithecidae</i> | <i>Ptilocolobus gordonorum</i>  | M_Africa   | ALL | EN | D | DI | AR   | M | FS   | F_F | 1  | 173 |
| TP | <i>Cercopithecidae</i> | <i>Ptilocolobus rufomitratu</i> | M_Africa   | F   | EN | D | DI | AR   | M | FS   | FOL | 1  | 164 |
| TP | <i>Hominidae</i>       | <i>Pongo abelii</i>             | Asia       | ALL | CR | D | DI | AR   | L | FS   | FRU | 2  | 31  |
| TP | <i>Hominidae</i>       | <i>Pongo abelii</i>             | Asia       | F   | CR | D | DI | AR   | L | FS   | FRU | 2  | 143 |
| TP | <i>Hominidae</i>       | <i>Pongo pygmaeus</i>           | Asia       | F   | EN | D | DI | AR   | L | FS   | FRU | 2  | 206 |
| TP | <i>Cercopithecidae</i> | <i>Presbytis thomasi</i>        | Asia       | F   | VU | D | DI | AR   | M | FS   | F_F | 2  | 143 |
| TP | <i>Indriidae</i>       | <i>Propithecus verreauxi</i>    | Madagascar | ALL | EN | D | DI | AR   | M | N_FS | F_F | 4  | 86  |
| TP | <i>Indriidae</i>       | <i>Propithecus verreauxi</i>    | Madagascar | F   | EN | D | DI | AR   | M | N_FS | F_F | 4  | 86  |
| TP | <i>Cebidae</i>         | <i>Saimiri oerstedii</i>        | Neotropics | NR  | VU | D | DI | AR   | S | FS   | O   | 3  | 69  |
| TP | <i>Cebidae</i>         | <i>Sapajus nigritus</i>         | Neotropics | F   | NT | D | DI | AR   | M | FS   | O   | 4  | 136 |
| TP | <i>Cebidae</i>         | <i>Sapajus nigritus</i>         | Neotropics | F   | NT | D | DI | AR   | M | FS   | O   | 4  | 160 |
| TP | <i>Cebidae</i>         | <i>Sapajus nigritus</i>         | Neotropics | F   | NT | D | DI | AR   | M | FS   | O   | 4  | 161 |

|    |                        |                                 |            |     |    |    |    |    |   |      |     |    |     |
|----|------------------------|---------------------------------|------------|-----|----|----|----|----|---|------|-----|----|-----|
| TP | <i>Cebidae</i>         | <i>Sapajus xanthosternos</i>    | Neotropics | F   | CR | D  | DI | AR | M | FS   | O   | 4  | 32  |
| TP | <i>Cercopithecidae</i> | <i>Semnopithecus entellus</i>   | Asia       | NR  | LC | D  | DI | T  | L | N_FS | F_F | 8  | 119 |
| TP | <i>Cercopithecidae</i> | <i>Semnopithecus vetulus</i>    | Asia       | F   | EN | D  | DI | AR | M | FS   | F_F | 10 | 182 |
| TP | <i>Cercopithecidae</i> | <i>Semnopithecus vetulus</i>    | Asia       | NR  | EN | D  | DI | AR | M | FS   | F_F | 10 | 211 |
| TP | <i>Cercopithecidae</i> | <i>Semnopithecus vetulus</i>    | Asia       | F   | EN | D  | DI | AR | M | FS   | F_F | 10 | 55  |
| TP | <i>Cercopithecidae</i> | <i>Semnopithecus vetulus</i>    | Asia       | F   | EN | D  | DI | AR | M | FS   | F_F | 10 | 56  |
| TP | <i>Cercopithecidae</i> | <i>Semnopithecus vetulus</i>    | Asia       | F   | EN | D  | DI | AR | M | FS   | F_F | 10 | 215 |
| TP | <i>Cercopithecidae</i> | <i>Semnopithecus vetulus</i>    | Asia       | F   | EN | D  | DI | AR | M | FS   | F_F | 10 | 67  |
| TP | <i>Hylobatidae</i>     | <i>Symphalangus syndactylus</i> | Asia       | NR  | EN | D  | DI | AR | L | FS   | F_F | 1  | 11  |
| TP | <i>Tarsiidae</i>       | <i>Tarsius dentatus</i>         | Asia       | TR  | VU | D  | N  | AR | S | FS   | IN  | 3  | 158 |
| TP | <i>Tarsiidae</i>       | <i>Tarsius dentatus</i>         | Asia       | R   | VU | D  | N  | AR | S | FS   | IN  | 3  | 159 |
| TP | <i>Cercopithecidae</i> | <i>Trachypithecus auratus</i>   | Asia       | TR  | VU | D  | DI | AR | M | FS   | FOL | 2  | 170 |
| TP | <i>Cercopithecidae</i> | <i>Trachypithecus cristatus</i> | Asia       | NR  | NT | D  | DI | AR | M | FS   | FOL | 1  | 11  |
| TP | <i>Cercopithecidae</i> | <i>Trachypithecus germaini</i>  | Asia       | F   | EN | D  | DI | AR | M | FS   | FOL | 2  | 143 |
| TP | <i>Cercopithecidae</i> | <i>Trachypithecus obscurus</i>  | Asia       | NR  | NT | D  | DI | AR | M | FS   | FOL | 2  | 11  |
| CO | <i>Atelidae</i>        | <i>Alouatta caraya</i>          | Neotropics | ALL | LC | D  | DI | AR | M | N_FS | F_F | 2  | 2   |
| CO | <i>Atelidae</i>        | <i>Alouatta guariba</i>         | Neotropics | TR  | LC | D  | DI | AR | M | FS   | F_F | 5  | 238 |
| CO | <i>Atelidae</i>        | <i>Alouatta guariba</i>         | Neotropics | TR  | LC | D  | DI | AR | M | FS   | F_F | 5  | 138 |
| CO | <i>Atelidae</i>        | <i>Alouatta palliata</i>        | Neotropics | ALL | LC | NI | DI | AR | M | FS   | F_F | 25 | 10  |
| CO | <i>Atelidae</i>        | <i>Alouatta palliata</i>        | Neotropics | NR  | LC | NI | DI | AR | M | FS   | F_F | 25 | 150 |
| CO | <i>Atelidae</i>        | <i>Alouatta palliata</i>        | Neotropics | NR  | LC | NI | DI | AR | M | FS   | F_F | 25 | 69  |
| CO | <i>Atelidae</i>        | <i>Alouatta palliata</i>        | Neotropics | NR  | LC | NI | DI | AR | M | FS   | F_F | 25 | 69  |
| CO | <i>Atelidae</i>        | <i>Alouatta palliata</i>        | Neotropics | TR  | LC | NI | DI | AR | M | FS   | F_F | 21 | 152 |
| CO | <i>Atelidae</i>        | <i>Alouatta palliata</i>        | Neotropics | ALL | LC | NI | DI | AR | M | FS   | F_F | 25 | 234 |
| CO | <i>Atelidae</i>        | <i>Alouatta palliata</i>        | Neotropics | TR  | LC | NI | DI | AR | M | FS   | F_F | 25 | 73  |
| CO | <i>Atelidae</i>        | <i>Alouatta palliata</i>        | Neotropics | TR  | LC | NI | DI | AR | M | FS   | F_F | 25 | 58  |
| CO | <i>Atelidae</i>        | <i>Alouatta palliata</i>        | Neotropics | TR  | LC | NI | DI | AR | M | FS   | F_F | 25 | 137 |
| CO | <i>Atelidae</i>        | <i>Alouatta palliata</i>        | Neotropics | TR  | LC | NI | DI | AR | M | FS   | F_F | 25 | 166 |
| CO | <i>Atelidae</i>        | <i>Alouatta palliata</i>        | Neotropics | ALL | LC | NI | DI | AR | M | FS   | F_F | 25 | 139 |
| CO | <i>Atelidae</i>        | <i>Alouatta pigra</i>           | Neotropics | ALL | EN | D  | DI | AR | M | FS   | F_F | 12 | 197 |
| CO | <i>Atelidae</i>        | <i>Alouatta pigra</i>           | Neotropics | ALL | EN | D  | DI | AR | M | FS   | F_F | 12 | 198 |

|    |                        |                                |            |     |    |    |    |    |   |      |     |    |     |
|----|------------------------|--------------------------------|------------|-----|----|----|----|----|---|------|-----|----|-----|
| CO | <i>Atelidae</i>        | <i>Alouatta pigra</i>          | Neotropics | NR  | EN | D  | DI | AR | M | FS   | F_F | 12 | 69  |
| CO | <i>Atelidae</i>        | <i>Alouatta pigra</i>          | Neotropics | F   | EN | D  | DI | AR | M | FS   | F_F | 12 | 9   |
| CO | <i>Atelidae</i>        | <i>Alouatta seniculus</i>      | Neotropics | F   | LC | NI | DI | AR | M | N_FS | F_F | 7  | 194 |
| CO | <i>Atelidae</i>        | <i>Alouatta seniculus</i>      | Neotropics | F   | LC | NI | DI | AR | M | N_FS | F_F | 7  | 34  |
| CO | <i>Atelidae</i>        | <i>Alouatta seniculus</i>      | Neotropics | ALL | LC | NI | DI | AR | M | N_FS | F_F | 7  | 169 |
| CO | <i>Atelidae</i>        | <i>Alouatta seniculus</i>      | Neotropics | TR  | LC | NI | DI | AR | M | N_FS | F_F | 7  | 29  |
| CO | <i>Aotidae</i>         | <i>Aotus lemurinus</i>         | Neotropics | F   | VU | D  | N  | AR | S | FS   | O   | 2  | 38  |
| CO | <i>Atelidae</i>        | <i>Ateles belzebuth</i>        | Neotropics | TR  | EN | D  | DI | AR | M | FS   | FRU | 2  | 98  |
| CO | <i>Atelidae</i>        | <i>Ateles geoffroyi</i>        | Neotropics | NR  | EN | D  | DI | AR | M | FS   | FRU | 19 | 157 |
| CO | <i>Atelidae</i>        | <i>Ateles geoffroyi</i>        | Neotropics | NR  | EN | D  | DI | AR | M | FS   | FRU | 19 | 69  |
| CO | <i>Atelidae</i>        | <i>Ateles geoffroyi</i>        | Neotropics | F   | EN | D  | DI | AR | M | FS   | FRU | 19 | 191 |
| CO | <i>Atelidae</i>        | <i>Ateles geoffroyi</i>        | Neotropics | F   | EN | D  | DI | AR | M | FS   | FRU | 19 | 191 |
| CO | <i>Atelidae</i>        | <i>Ateles geoffroyi</i>        | Neotropics | NR  | EN | D  | DI | AR | M | FS   | FRU | 19 | 254 |
| CO | <i>Atelidae</i>        | <i>Ateles geoffroyi</i>        | Neotropics | TR  | EN | D  | DI | AR | M | FS   | FRU | 19 | 58  |
| CO | <i>Atelidae</i>        | <i>Ateles geoffroyi</i>        | Neotropics | TR  | EN | D  | DI | AR | M | FS   | FRU | 19 | 166 |
| CO | <i>Atelidae</i>        | <i>Ateles geoffroyi</i>        | Neotropics | TR  | EN | D  | DI | AR | M | FS   | FRU | 19 | 139 |
| CO | <i>Indriidae</i>       | <i>Avahi laniger</i>           | Madagascar | TR  | VU | D  | N  | AR | S | FS   | FOL | 2  | 145 |
| CO | <i>Cebidae</i>         | <i>Cebus capucinus</i>         | Neotropics | NR  | LC | NI | DI | AR | M | FS   | O   | 15 | 69  |
| CO | <i>Cebidae</i>         | <i>Cebus capucinus</i>         | Neotropics | F   | LC | NI | DI | AR | M | FS   | O   | 15 | 252 |
| CO | <i>Cebidae</i>         | <i>Cebus capucinus</i>         | Neotropics | TR  | LC | NI | DI | AR | M | FS   | O   | 15 | 142 |
| CO | <i>Atelidae</i>        | <i>Cebus capucinus</i>         | Neotropics | TR  | LC | NI | DI | AR | M | FS   | O   | 15 | 139 |
| CO | <i>Cercopithecidae</i> | <i>Cercopithecus ascanius</i>  | M_Africa   | TR  | LC | NI | DI | AR | M | FS   | FRU | 12 | 44  |
| CO | <i>Cercopithecidae</i> | <i>Cercopithecus ascanius</i>  | M_Africa   | TR  | LC | NI | DI | AR | M | FS   | FRU | 12 | 179 |
| CO | <i>Cercopithecidae</i> | <i>Cercopithecus campbelli</i> | M_Africa   | F   | LC | NI | DI | AR | M | N_FS | FRU | 5  | 92  |
| CO | <i>Cercopithecidae</i> | <i>Cercopithecus mitis</i>     | M_Africa   | F   | LC | D  | DI | AR | M | FS   | O   | 10 | 186 |
| CO | <i>Cercopithecidae</i> | <i>Cercopithecus mitis</i>     | M_Africa   | TR  | LC | D  | DI | AR | M | FS   | O   | 10 | 28  |
| CO | <i>Cheirogaleidae</i>  | <i>Cheirogaleus major</i>      | Madagascar | TR  | DD | D  | N  | AR | S | FS   | F_F | 2  | 145 |
| CO | <i>Pitheciidae</i>     | <i>Chiropotes chiropotes</i>   | Neotropics | TR  | LC | S  | DI | AR | M | FS   | FRU | 2  | 27  |
| CO | <i>Pitheciidae</i>     | <i>Chiropotes satanas</i>      | Neotropics | TR  | CR | D  | DI | AR | M | FS   | FRU | 2  | 26  |
| CO | <i>Cercopithecidae</i> | <i>Chlorocebus aethiops</i>    | M_Africa   | R   | LC | S  | DI | T  | M | N_FS | O   | 12 | 235 |

|    |                        |                                   |            |     |    |    |      |      |   |      |     |    |     |
|----|------------------------|-----------------------------------|------------|-----|----|----|------|------|---|------|-----|----|-----|
| CO | <i>Cercopithecidae</i> | <i>Colobus angolensis</i>         | M_Africa   | TR  | LC | NI | DI   | AR   | M | FS   | FOL | 5  | 6   |
| CO | <i>Lemuridae</i>       | <i>Eulemur fulvus</i>             | Madagascar | TR  | NT | D  | CATH | AR   | M | FS   | F_F | 2  | 145 |
| CO | <i>Lemuridae</i>       | <i>Eulemur rubriventer</i>        | Madagascar | TR  | VU | D  | CATH | AR   | S | FS   | F_F | 1  | 145 |
| CO | <i>Lemuridae</i>       | <i>Haplemur griseus</i>           | Madagascar | TR  | VU | D  | DI   | AR   | S | FS   | FOL | 2  | 145 |
| CO | <i>Lemuridae</i>       | <i>Haplemur meridionalis</i>      | Madagascar | ALL | VU | D  | CATH | AR   | S | FS   | FOL | 1  | 65  |
| CO | <i>Hylobatidae</i>     | <i>Hoolock hoolock</i>            | Asia       | TR  | EN | D  | DI   | AR   | M | FS   | FRU | 1  | 52  |
| CO | <i>Hylobatidae</i>     | <i>Hylobates agilis</i>           | Asia       | F   | EN | D  | DI   | AR   | M | FS   | FRU | 1  | 167 |
| CO | <i>Callitrichidae</i>  | <i>Leontopithecus chrysomelas</i> | Neotropics | ALL | EN | D  | DI   | AR   | S | FS   | O   | 4  | 201 |
| CO | <i>Callitrichidae</i>  | <i>Leontopithecus chrysopygus</i> | Neotropics | TR  | EN | D  | DI   | AR   | S | FS   | FRU | 1  | 244 |
| CO | <i>Cercopithecidae</i> | <i>Macaca fascicularis</i>        | Asia       | F   | LC | D  | DI   | AR   | M | FS   | FRU | 10 | 167 |
| CO | <i>Cheirogaleidae</i>  | <i>Microcebus murinus</i>         | Madagascar | TR  | LC | D  | N    | AR   | S | N_FS | O   | 3  | 8   |
| CO | <i>Hylobatidae</i>     | <i>Nomascus concolor</i>          | Asia       | F   | CR | D  | DI   | AR   | M | FS   | F_F | 2  | 189 |
| CO | <i>Hominidae</i>       | <i>Pan troglodytes</i>            | M_Africa   | F   | EN | D  | DI   | BOTH | L | N_FS | O   | 17 | 153 |
| CO | <i>Cercopithecidae</i> | <i>Papio anubis</i>               | M_Africa   | ALL | LC | I  | DI   | T    | L | N_FS | O   | 11 | 214 |
| CO | <i>Cercopithecidae</i> | <i>Papio hamadryas</i>            | M_Africa   | TR  | LC | I  | DI   | T    | L | N_FS | O   | 4  | 188 |
| CO | <i>Cercopithecidae</i> | <i>Ptilocolobus badius</i>        | M_Africa   | R   | EN | D  | DI   | AR   | M | FS   | F_F | 5  | 84  |
| CO | <i>Pitheciidae</i>     | <i>Plecturocebus cupreus</i>      | Neotropics | TR  | LC | NI | DI   | AR   | S | FS   | FRU | 2  | 194 |
| CO | <i>Pitheciidae</i>     | <i>Plecturocebus Moloch</i>       | Neotropics | NR  | LC | NI | DI   | AR   | S | FS   | O   | 2  | 130 |
| CO | <i>Pitheciidae</i>     | <i>Plecturocebus oenanthe</i>     | Neotropics | F   | CR | D  | DI   | AR   | S | N_FS | O   | 1  | 66  |
| CO | <i>Pitheciidae</i>     | <i>Plecturocebus olallae</i>      | Neotropics | NR  | EN | D  | DI   | AR   | S | N_FS | F_F | 2  | 76  |
| CO | <i>Cercopithecidae</i> | <i>Presbytis melalophos</i>       | Asia       | F   | NT | D  | DI   | AR   | M | N_FS | F_F | 2  | 167 |
| CO | <i>Indriidae</i>       | <i>Propithecus diadema</i>        | Madagascar | TR  | CR | D  | DI   | AR   | M | FS   | F_F | 1  | 145 |
| CO | <i>Cercopithecidae</i> | <i>Rhinopithecus bieti</i>        | Asia       | TR  | EN | D  | DI   | BOTH | L | FS   | FOL | 2  | 134 |
| CO | <i>Cercopithecidae</i> | <i>Rungwecebus kipunji</i>        | M_Africa   | TR  | CR | D  | DI   | AR   | L | FS   | O   | 2  | 28  |
| CO | <i>Callitrichidae</i>  | <i>Saguinus leucopus</i>          | Neotropics | TR  | EN | D  | DI   | AR   | S | FS   | FRU | 7  | 209 |
| CO | <i>Callitrichidae</i>  | <i>Saguinus leucopus</i>          | Neotropics | F   | EN | D  | DI   | AR   | S | FS   | FRU | 7  | 53  |
| CO | <i>Callitrichidae</i>  | <i>Saguinus leucopus</i>          | Neotropics | TR  | EN | D  | DI   | AR   | S | FS   | FRU | 7  | 127 |
| CO | <i>Cebidae</i>         | <i>Saimiri cassiquiarensis</i>    | Neotropics | NR  | LC | NI | DI   | AR   | S | N_FS | O   | 1  | 35  |
| CO | <i>Cebidae</i>         | <i>Saimiri oerstedii</i>          | Neotropics | NR  | VU | D  | DI   | AR   | S | FS   | O   | 3  | 69  |
| CO | <i>Cebidae</i>         | <i>Saimiri sciureus</i>           | Neotropics | F   | LC | D  | DI   | AR   | S | FS   | O   | 3  | 194 |
| CO | <i>Cebidae</i>         | <i>Sapajus apella</i>             | Neotropics | F   | LC | D  | DI   | AR   | M | N_FS | O   | 11 | 194 |

|    |                        |                                |            |     |    |    |    |    |   |      |     |    |     |
|----|------------------------|--------------------------------|------------|-----|----|----|----|----|---|------|-----|----|-----|
| CO | <i>Cebidae</i>         | <i>Sapajus apella</i>          | Neotropics | NR  | LC | D  | DI | AR | M | N_FS | O   | 11 | 130 |
| CO | <i>Cebidae</i>         | <i>Sapajus apella</i>          | Neotropics | TR  | LC | D  | DI | AR | M | N_FS | O   | 11 | 244 |
| CO | <i>Cebidae</i>         | <i>Sapajus libidinosus</i>     | Neotropics | ALL | LC | D  | DI | AR | M | N_FS | O   | 3  | 2   |
| CO | <i>Cebidae</i>         | <i>Sapajus nigritus</i>        | Neotropics | ALL | NT | D  | DI | AR | M | FS   | O   | 4  | 2   |
| CO | <i>Cercopithecidae</i> | <i>Semnopithecus vetulus</i>   | Asia       | TR  | EN | D  | DI | AR | M | FS   | F_F | 10 | 211 |
| CO | <i>Cercopithecidae</i> | <i>Semnopithecus vetulus</i>   | Asia       | TR  | EN | D  | DI | AR | M | FS   | F_F | 10 | 163 |
| CO | <i>Cercopithecidae</i> | <i>Semnopithecus vetulus</i>   | Asia       | TR  | EN | D  | DI | AR | M | FS   | F_F | 10 | 182 |
| CO | <i>Cercopithecidae</i> | <i>Semnopithecus vetulus</i>   | Asia       | F   | EN | D  | DI | AR | M | FS   | F_F | 10 | 56  |
| SF | <i>Cercopithecidae</i> | <i>Allochrocebus lhoesti</i>   | M_Africa   | NR  | VU | D  | DI | T  | M | N_FS | O   | 2  | 140 |
| SF | <i>Cercopithecidae</i> | <i>Allochrocebus lhoesti</i>   | M_Africa   | ALL | VU | D  | DI | T  | M | N_FS | O   | 2  | 118 |
| SF | <i>Atelidae</i>        | <i>Alouatta belzebul</i>       | Neotropics | NR  | VU | D  | DI | AR | M | FS   | F_F | 1  | 246 |
| SF | <i>Atelidae</i>        | <i>Alouatta guariba</i>        | Neotropics | NR  | LC | D  | DI | AR | M | FS   | F_F | 5  | 193 |
| SF | <i>Atelidae</i>        | <i>Alouatta guariba</i>        | Neotropics | ALL | LC | D  | DI | AR | M | FS   | F_F | 5  | 116 |
| SF | <i>Atelidae</i>        | <i>Alouatta macconnelli</i>    | Neotropics | NR  | LC | NI | DI | AR | M | N_FS | F_F | 3  | 133 |
| SF | <i>Atelidae</i>        | <i>Alouatta macconnelli</i>    | Neotropics | NR  | LC | NI | DI | AR | M | N_FS | F_F | 3  | 184 |
| SF | <i>Atelidae</i>        | <i>Alouatta macconnelli</i>    | Neotropics | NR  | LC | NI | DI | AR | M | N_FS | F_F | 3  | 183 |
| SF | <i>Atelidae</i>        | <i>Alouatta palliata</i>       | Neotropics | NR  | LC | NI | DI | AR | M | FS   | F_F | 25 | 181 |
| SF | <i>Atelidae</i>        | <i>Alouatta palliata</i>       | Neotropics | NR  | LC | NI | DI | AR | M | FS   | F_F | 25 | 230 |
| SF | <i>Atelidae</i>        | <i>Alouatta palliata</i>       | Neotropics | TR  | LC | NI | DI | AR | M | FS   | F_F | 25 | 74  |
| SF | <i>Atelidae</i>        | <i>Alouatta palliata</i>       | Neotropics | NR  | LC | NI | DI | AR | M | FS   | F_F | 25 | 54  |
| SF | <i>Atelidae</i>        | <i>Alouatta palliata</i>       | Neotropics | NR  | LC | NI | DI | AR | M | FS   | F_F | 25 | 40  |
| SF | <i>Atelidae</i>        | <i>Alouatta palliata</i>       | Neotropics | NR  | LC | NI | DI | AR | M | FS   | F_F | 25 | 41  |
| SF | <i>Atelidae</i>        | <i>Alouatta pigra</i>          | Neotropics | NR  | EN | D  | DI | AR | M | FS   | F_F | 12 | 242 |
| SF | <i>Atelidae</i>        | <i>Alouatta seniculus</i>      | Neotropics | ALL | LC | NI | DI | AR | M | N_FS | F_F | 7  | 98  |
| SF | <i>Atelidae</i>        | <i>Alouatta seniculus</i>      | Neotropics | NR  | LC | NI | DI | AR | M | N_FS | F_F | 7  | 19  |
| SF | <i>Lorisidae</i>       | <i>Arctocebus calabarensis</i> | M_Africa   | NR  | LC | NI | N  | AR | S | FS   | IN  | 1  | 88  |
| SF | <i>Atelidae</i>        | <i>Ateles belzebuth</i>        | Neotropics | ALL | EN | D  | DI | AR | M | FS   | FRU | 2  | 98  |
| SF | <i>Atelidae</i>        | <i>Ateles geoffroyi</i>        | Neotropics | NR  | EN | D  | DI | AR | M | FS   | FRU | 19 | 230 |
| SF | <i>Atelidae</i>        | <i>Ateles geoffroyi</i>        | Neotropics | NR  | EN | D  | DI | AR | M | FS   | FRU | 19 | 54  |
| SF | <i>Atelidae</i>        | <i>Ateles geoffroyi</i>        | Neotropics | F   | EN | D  | DI | AR | M | FS   | FRU | 19 | 203 |
| SF | <i>Atelidae</i>        | <i>Ateles geoffroyi</i>        | Neotropics | NR  | EN | D  | DI | AR | M | FS   | FRU | 19 | 42  |



|    |                        |                                |            |     |    |    |    |      |   |      |     |    |     |
|----|------------------------|--------------------------------|------------|-----|----|----|----|------|---|------|-----|----|-----|
| SF | <i>Atelidae</i>        | <i>Ateles geoffroyi</i>        | Neotropics | NR  | EN | D  | DI | AR   | M | FS   | FRU | 19 | 242 |
| SF | <i>Atelidae</i>        | <i>Ateles geoffroyi</i>        | Neotropics | TR  | EN | D  | DI | AR   | M | FS   | FRU | 19 | 204 |
| SF | <i>Atelidae</i>        | <i>Ateles geoffroyi</i>        | Neotropics | F   | EN | D  | DI | AR   | M | FS   | FRU | 19 | 205 |
| SF | <i>Atelidae</i>        | <i>Ateles geoffroyi</i>        | Neotropics | NR  | EN | D  | DI | AR   | M | FS   | FRU | 19 | 41  |
| SF | <i>Atelidae</i>        | <i>Ateles paniscus</i>         | Neotropics | NR  | VU | D  | DI | AR   | M | FS   | FRU | 2  | 133 |
| SF | <i>Atelidae</i>        | <i>Ateles paniscus</i>         | Neotropics | NR  | VU | D  | DI | AR   | M | FS   | FRU | 2  | 184 |
| SF | <i>Pitheciidae</i>     | <i>Callicebus coimbrai</i>     | Neotropics | NR  | EN | D  | DI | AR   | S | N_FS | FRU | 1  | 39  |
| SF | <i>Pitheciidae</i>     | <i>Callicebus melanochir</i>   | Neotropics | NR  | VU | D  | DI | AR   | S | FS   | FRU | 1  | 80  |
| SF | <i>Pitheciidae</i>     | <i>Callicebus personatus</i>   | Neotropics | NR  | VU | D  | DI | AR   | S | FS   | FRU | 2  | 193 |
| SF | <i>Pitheciidae</i>     | <i>Callicebus personatus</i>   | Neotropics | ALL | VU | D  | DI | AR   | S | FS   | FRU | 2  | 103 |
| SF | <i>Callitrichidae</i>  | <i>Callithrix jacchus</i>      | Neotropics | NR  | LC | S  | DI | AR   | S | N_FS | G   | 2  | 39  |
| SF | <i>Callitrichidae</i>  | <i>Callithrix penicillata</i>  | Neotropics | NR  | LC | I  | DI | AR   | S | N_FS | G   | 7  | 80  |
| SF | <i>Cebidae</i>         | <i>Cebus albifrons</i>         | Neotropics | ALL | LC | D  | DI | BOTH | M | FS   | O   | 2  | 98  |
| SF | <i>Cebidae</i>         | <i>Cebus albifrons</i>         | Neotropics | NR  | LC | D  | DI | BOTH | M | FS   | O   | 2  | 19  |
| SF | <i>Cebidae</i>         | <i>Cebus capucinus</i>         | Neotropics | NR  | LC | NI | DI | AR   | M | FS   | O   | 15 | 230 |
| SF | <i>Cebidae</i>         | <i>Cebus capucinus</i>         | Neotropics | NR  | LC | NI | DI | AR   | M | FS   | O   | 15 | 54  |
| SF | <i>Cebidae</i>         | <i>Cebus capucinus</i>         | Neotropics | ALL | LC | NI | DI | AR   | M | FS   | O   | 15 | 43  |
| SF | <i>Cebidae</i>         | <i>Cebus capucinus</i>         | Neotropics | NR  | LC | NI | DI | AR   | M | FS   | O   | 15 | 41  |
| SF | <i>Cercopithecidae</i> | <i>Cercocebus atys</i>         | M_Africa   | NR  | NT | D  | DI | T    | M | N_FS | FRU | 2  | 79  |
| SF | <i>Cercopithecidae</i> | <i>Cercocebus atys</i>         | M_Africa   | NR  | NT | D  | DI | T    | M | N_FS | FRU | 2  | 78  |
| SF | <i>Cercopithecidae</i> | <i>Cercocebus galeritus</i>    | M_Africa   | F   | EN | D  | DI | BOTH | M | FS   | FRU | 3  | 251 |
| SF | <i>Cercopithecidae</i> | <i>Cercopithecus ascanius</i>  | M_Africa   | NR  | LC | NI | DI | AR   | M | FS   | FRU | 12 | 239 |
| SF | <i>Cercopithecidae</i> | <i>Cercopithecus ascanius</i>  | M_Africa   | F   | LC | NI | DI | AR   | M | FS   | FRU | 12 | 223 |
| SF | <i>Cercopithecidae</i> | <i>Cercopithecus ascanius</i>  | M_Africa   | NR  | LC | NI | DI | AR   | M | FS   | FRU | 12 | 140 |
| SF | <i>Cercopithecidae</i> | <i>Cercopithecus campbelli</i> | M_Africa   | NR  | LC | NI | DI | AR   | M | N_FS | FRU | 5  | 79  |
| SF | <i>Cercopithecidae</i> | <i>Cercopithecus campbelli</i> | M_Africa   | NR  | LC | NI | DI | AR   | M | N_FS | FRU | 5  | 78  |
| SF | <i>Cercopithecidae</i> | <i>Cercopithecus cephus</i>    | M_Africa   | NR  | LC | NI | DI | AR   | M | FS   | FRU | 2  | 88  |
| SF | <i>Cercopithecidae</i> | <i>Cercopithecus diana</i>     | M_Africa   | NR  | VU | D  | DI | AR   | M | FS   | FRU | 2  | 79  |
| SF | <i>Cercopithecidae</i> | <i>Cercopithecus diana</i>     | M_Africa   | NR  | VU | D  | DI | AR   | M | FS   | FRU | 2  | 78  |
| SF | <i>Cercopithecidae</i> | <i>Cercopithecus mitis</i>     | M_Africa   | NR  | LC | D  | DI | AR   | M | FS   | O   | 10 | 239 |
| SF | <i>Cercopithecidae</i> | <i>Cercopithecus mitis</i>     | M_Africa   | F   | LC | D  | DI | AR   | M | FS   | O   | 10 | 118 |

|    |                        |                                     |            |     |    |    |      |      |   |      |     |    |     |
|----|------------------------|-------------------------------------|------------|-----|----|----|------|------|---|------|-----|----|-----|
| SF | <i>Cercopithecidae</i> | <i>Cercopithecus nictitans</i>      | M_Africa   | NR  | LC | D  | DI   | AR   | M | FS   | FRU | 3  | 88  |
| SF | <i>Cercopithecidae</i> | <i>Cercopithecus petaurista</i>     | M_Africa   | NR  | LC | NI | DI   | AR   | M | N_FS | O   | 2  | 79  |
| SF | <i>Cercopithecidae</i> | <i>Cercopithecus petaurista</i>     | M_Africa   | NR  | LC | NI | DI   | AR   | M | N_FS | O   | 2  | 78  |
| SF | <i>Cercopithecidae</i> | <i>Cercopithecus pogonias</i>       | M_Africa   | NR  | LC | D  | DI   | AR   | M | N_FS | FRU | 3  | 88  |
| SF | <i>Cercopithecidae</i> | <i>Cercopithecus pogonias</i>       | M_Africa   | NR  | LC | D  | DI   | AR   | M | N_FS | FRU | 3  | 239 |
| SF | <i>Pitheciidae</i>     | <i>Chiropotes chiropotes</i>        | Neotropics | NR  | LC | S  | DI   | AR   | M | FS   | FRU | 2  | 133 |
| SF | <i>Pitheciidae</i>     | <i>Chiropotes satanas</i>           | Neotropics | TR  | CR | D  | DI   | AR   | M | FS   | FRU | 2  | 90  |
| SF | <i>Cercopithecidae</i> | <i>Colobus angolensis</i>           | M_Africa   | NR  | LC | NI | DI   | AR   | M | FS   | FOL | 5  | 239 |
| SF | <i>Cercopithecidae</i> | <i>Colobus guereza</i>              | M_Africa   | NR  | LC | NI | DI   | AR   | M | FS   | F_F | 3  | 239 |
| SF | <i>Cercopithecidae</i> | <i>Colobus guereza</i>              | M_Africa   | NR  | LC | NI | DI   | AR   | M | FS   | F_F | 3  | 140 |
| SF | <i>Cercopithecidae</i> | <i>Colobus guereza</i>              | M_Africa   | F   | LC | NI | DI   | AR   | M | FS   | F_F | 3  | 71  |
| SF | <i>Cercopithecidae</i> | <i>Colobus polykomos</i>            | M_Africa   | NR  | VU | NI | DI   | AR   | M | FS   | FOL | 2  | 79  |
| SF | <i>Cercopithecidae</i> | <i>Colobus polykomos</i>            | M_Africa   | NR  | VU | NI | DI   | AR   | M | FS   | FOL | 2  | 78  |
| SF | <i>Daubentoniidae</i>  | <i>Daubentonia madagascariensis</i> | Madagascar | ALL | EN | D  | N    | AR   | M | N_FS | IN  | 1  | 5   |
| SF | <i>Lemuridae</i>       | <i>Eulemur flavifrons</i>           | Madagascar | ALL | CR | D  | CATH | AR   | S | FS   | F_F | 1  | 224 |
| SF | <i>Lemuridae</i>       | <i>Eulemur macaco</i>               | Madagascar | ALL | VU | D  | CATH | AR   | M | FS   | FRU | 1  | 16  |
| SF | <i>Galagidae</i>       | <i>Galago elegantulus</i>           | M_Africa   | NR  | LC | S  | N    | AR   | S | FS   | G   | 1  | 88  |
| SF | <i>Galagidae</i>       | <i>Galagoides demidovii</i>         | M_Africa   | NR  | LC | S  | N    | AR   | S | FS   | O   | 1  | 88  |
| SF | <i>Hominidae</i>       | <i>Gorilla beringei</i>             | M_Africa   | F   | EN | D  | DI   | BOTH | L | FS   | F_F | 1  | 257 |
| SF | <i>Hominidae</i>       | <i>Gorilla gorilla</i>              | M_Africa   | R   | CR | D  | DI   | BOTH | L | FS   | F_F | 2  | 88  |
| SF | <i>Hominidae</i>       | <i>Gorilla gorilla</i>              | M_Africa   | R   | CR | D  | DI   | BOTH | L | FS   | F_F | 2  | 148 |
| SF | <i>Hylobatidae</i>     | <i>Hylobates lar</i>                | Asia       | NR  | EN | D  | DI   | AR   | M | FS   | FRU | 2  | 115 |
| SF | <i>Hylobatidae</i>     | <i>Hylobates muelleri</i>           | Asia       | NR  | EN | D  | DI   | AR   | M | FS   | FRU | 1  | 91  |
| SF | <i>Callitrichidae</i>  | <i>Leontocebus fuscicollis</i>      | Neotropics | F   | LC | D  | DI   | AR   | S | FS   | O   | 4  | 50  |
| SF | <i>Callitrichidae</i>  | <i>Leontocebus fuscicollis</i>      | Neotropics | F   | LC | D  | DI   | AR   | S | FS   | O   | 4  | 51  |
| SF | <i>Callitrichidae</i>  | <i>Leontocebus fuscicollis</i>      | Neotropics | R   | LC | D  | DI   | AR   | S | FS   | O   | 4  | 129 |
| SF | <i>Callitrichidae</i>  | <i>Leontocebus nigrifrons</i>       | Neotropics | F   | LC | D  | DI   | AR   | S | FS   | O   | 1  | 126 |
| SF | <i>Cercopithecidae</i> | <i>Lophocebus albigena</i>          | M_Africa   | NR  | LC | D  | DI   | AR   | M | FS   | FRU | 2  | 239 |
| SF | <i>Cercopithecidae</i> | <i>Lophocebus albigena</i>          | M_Africa   | NR  | LC | D  | DI   | AR   | M | FS   | FRU | 2  | 140 |
| SF | <i>Cercopithecidae</i> | <i>Macaca fascicularis</i>          | Asia       | NR  | LC | D  | DI   | AR   | M | FS   | FRU | 10 | 115 |
| SF | <i>Cercopithecidae</i> | <i>Macaca nemestrina</i>            | Asia       | NR  | VU | D  | DI   | T    | M | FS   | FRU | 4  | 115 |

|    |                        |                                  |            |     |    |    |    |      |   |      |     |    |     |
|----|------------------------|----------------------------------|------------|-----|----|----|----|------|---|------|-----|----|-----|
| SF | <i>Cercopithecidae</i> | <i>Macaca nigra</i>              | Asia       | F   | CR | D  | DI | T    | M | FS   | FRU | 1  | 212 |
| SF | <i>Cercopithecidae</i> | <i>Mandrillus sphinx</i>         | M_Africa   | ALL | VU | NI | DI | T    | L | FS   | O   | 1  | 88  |
| SF | <i>Cheirogaleidae</i>  | <i>Microcebus murinus</i>        | Madagascar | NR  | LC | D  | N  | AR   | S | N_FS | O   | 3  | 87  |
| SF | <i>Cercopithecidae</i> | <i>Miopithecus talapoin</i>      | M_Africa   | NR  | LC | NI | DI | BOTH | S | FS   | O   | 2  | 88  |
| SF | <i>Hylobatidae</i>     | <i>Nomascus concolor</i>         | Asia       | ALL | CR | D  | DI | AR   | M | FS   | F_F | 2  | 189 |
| SF | <i>Hominidae</i>       | <i>Pan troglodytes</i>           | M_Africa   | F   | EN | D  | DI | BOTH | L | N_FS | O   | 17 | 14  |
| SF | <i>Hominidae</i>       | <i>Pan troglodytes</i>           | M_Africa   | R   | EN | D  | DI | BOTH | L | N_FS | O   | 17 | 88  |
| SF | <i>Hominidae</i>       | <i>Pan troglodytes</i>           | M_Africa   | NR  | EN | D  | DI | BOTH | L | N_FS | O   | 17 | 140 |
| SF | <i>Cercopithecidae</i> | <i>Papio anubis</i>              | M_Africa   | NR  | LC | I  | DI | T    | L | N_FS | O   | 11 | 140 |
| SF | <i>Lorisiidae</i>      | <i>Perodicticus potto</i>        | M_Africa   | NR  | LC | S  | N  | AR   | S | FS   | FRU | 1  | 88  |
| SF | <i>Cercopithecidae</i> | <i>Piliocolobus badius</i>       | M_Africa   | NR  | EN | D  | DI | AR   | M | FS   | F_F | 5  | 239 |
| SF | <i>Cercopithecidae</i> | <i>Piliocolobus badius</i>       | M_Africa   | NR  | EN | D  | DI | AR   | M | FS   | F_F | 5  | 79  |
| SF | <i>Cercopithecidae</i> | <i>Piliocolobus badius</i>       | M_Africa   | NR  | EN | D  | DI | AR   | M | FS   | F_F | 5  | 78  |
| SF | <i>Cercopithecidae</i> | <i>Piliocolobus tephrosceles</i> | M_Africa   | NR  | EN | D  | DI | AR   | M | FS   | FOL | 1  | 140 |
| SF | <i>Pitheciidae</i>     | <i>Pithecia irrorata</i>         | Neotropics | NR  | LC | NI | DI | AR   | M | FS   | FRU | 1  | 246 |
| SF | <i>Pitheciidae</i>     | <i>Pithecia pithecia</i>         | Neotropics | NR  | LC | NI | DI | AR   | S | FS   | FRU | 2  | 133 |
| SF | <i>Pitheciidae</i>     | <i>Pithecia pithecia</i>         | Neotropics | NR  | LC | NI | DI | AR   | S | FS   | FRU | 2  | 183 |
| SF | <i>Pitheciidae</i>     | <i>Plecturocebus cupreus</i>     | Neotropics | ALL | LC | NI | DI | AR   | S | FS   | FRU | 2  | 123 |
| SF | <i>Hominidae</i>       | <i>Pongo pygmaeus</i>            | Asia       | ALL | EN | D  | DI | AR   | L | FS   | FRU | 2  | 216 |
| SF | <i>Cercopithecidae</i> | <i>Presbytis hosei</i>           | Asia       | NR  | DD | D  | DI | AR   | M | FS   | FOL | 1  | 171 |
| SF | <i>Cercopithecidae</i> | <i>Presbytis melalophos</i>      | Asia       | NR  | NT | D  | DI | AR   | M | N_FS | F_F | 2  | 115 |
| SF | <i>Cercopithecidae</i> | <i>Procolobus verus</i>          | M_Africa   | NR  | NT | NI | DI | AR   | M | FS   | FOL | 2  | 79  |
| SF | <i>Cercopithecidae</i> | <i>Procolobus verus</i>          | M_Africa   | ALL | NT | NI | DI | AR   | M | FS   | FOL | 2  | 174 |
| SF | <i>Indriidae</i>       | <i>Propithecus verreauxi</i>     | Madagascar | ALL | EN | D  | DI | AR   | M | N_FS | F_F | 4  | 172 |
| SF | <i>Cercopithecidae</i> | <i>Rhinopithecus bieti</i>       | Asia       | F   | EN | D  | DI | BOTH | L | FS   | FOL | 2  | 255 |
| SF | <i>Cercopithecidae</i> | <i>Rhinopithecus roxellana</i>   | Asia       | NR  | EN | D  | DI | BOTH | L | FS   | FOL | 1  | 135 |
| SF | <i>Callitrichidae</i>  | <i>Saguinus leucopus</i>         | Neotropics | ALL | EN | D  | DI | AR   | S | FS   | FRU | 7  | 98  |
| SF | <i>Callitrichidae</i>  | <i>Saguinus leucopus</i>         | Neotropics | ALL | EN | D  | DI | AR   | S | FS   | FRU | 7  | 19  |
| SF | <i>Callitrichidae</i>  | <i>Saguinus midas</i>            | Neotropics | NR  | LC | S  | DI | AR   | S | N_FS | O   | 2  | 133 |
| SF | <i>Callitrichidae</i>  | <i>Saguinus midas</i>            | Neotropics | NR  | LC | S  | DI | AR   | S | N_FS | O   | 2  | 183 |
| SF | <i>Callitrichidae</i>  | <i>Saguinus mystax</i>           | Neotropics | F   | LC | S  | DI | AR   | S | FS   | O   | 4  | 50  |

|    |                        |                                |            |     |    |    |    |    |   |      |     |    |     |
|----|------------------------|--------------------------------|------------|-----|----|----|----|----|---|------|-----|----|-----|
| SF | <i>Callitrichidae</i>  | <i>Saguinus mystax</i>         | Neotropics | F   | LC | S  | DI | AR | S | FS   | O   | 4  | 51  |
| SF | <i>Callitrichidae</i>  | <i>Saguinus mystax</i>         | Neotropics | R   | LC | S  | DI | AR | S | FS   | O   | 4  | 129 |
| SF | <i>Cebidae</i>         | <i>Saimiri oerstedii</i>       | Neotropics | ALL | VU | D  | DI | AR | S | FS   | O   | 3  | 24  |
| SF | <i>Cebidae</i>         | <i>Saimiri sciureus</i>        | Neotropics | NR  | LC | D  | DI | AR | S | FS   | O   | 3  | 183 |
| SF | <i>Cebidae</i>         | <i>Sapajus apella</i>          | Neotropics | NR  | LC | D  | DI | AR | M | N_FS | O   | 11 | 133 |
| SF | <i>Cebidae</i>         | <i>Sapajus apella</i>          | Neotropics | NR  | LC | D  | DI | AR | M | N_FS | O   | 11 | 184 |
| SF | <i>Cebidae</i>         | <i>Sapajus apella</i>          | Neotropics | NR  | LC | D  | DI | AR | M | N_FS | O   | 11 | 193 |
| SF | <i>Cebidae</i>         | <i>Sapajus apella</i>          | Neotropics | NR  | LC | D  | DI | AR | M | N_FS | O   | 11 | 183 |
| SF | <i>Cebidae</i>         | <i>Sapajus apella</i>          | Neotropics | TR  | LC | D  | DI | AR | M | N_FS | O   | 11 | 90  |
| SF | <i>Cebidae</i>         | <i>Sapajus apella</i>          | Neotropics | NR  | LC | D  | DI | AR | M | N_FS | O   | 11 | 246 |
| SF | <i>Cebidae</i>         | <i>Sapajus xanthosternos</i>   | Neotropics | NR  | CR | D  | DI | AR | M | FS   | O   | 4  | 80  |
| SF | <i>Cebidae</i>         | <i>Sapajus xanthosternos</i>   | Neotropics | NR  | CR | D  | DI | AR | M | FS   | O   | 4  | 39  |
| SF | <i>Cebidae</i>         | <i>Sapajus xanthosternos</i>   | Neotropics | F   | CR | D  | DI | AR | M | FS   | O   | 4  | 33  |
| SF | <i>Galagidae</i>       | <i>Sciurocheirus alleni</i>    | M_Africa   | NR  | EN | NI | N  | AR | S | FS   | FRU | 1  | 88  |
| SF | <i>Cercopithecidae</i> | <i>Trachypithecus auratus</i>  | Asia       | ALL | VU | D  | DI | AR | M | FS   | FOL | 2  | 122 |
| SF | <i>Cercopithecidae</i> | <i>Trachypithecus obscurus</i> | Asia       | NR  | NT | D  | DI | AR | M | FS   | FOL | 2  | 115 |
| SF | <i>Cercopithecidae</i> | <i>Trachypithecus phayrei</i>  | Asia       | ALL | EN | D  | DI | AR | M | N_FS | FOL | 1  | 99  |
| SF | <i>Lemuridae</i>       | <i>Varecia rubra</i>           | Madagascar | F   | CR | D  | DI | AR | M | FS   | FRU | 1  | 144 |

<sup>a</sup>For taxonomy, we followed: Estrada, A. *et al.* Impending extinction crisis of the world's primates: why primates matter. *Sci. Adv.* **3**, e1600946 (2017).

**Supplementary Table 2. Sensitivity analysis for phylogenetic signal in matrix use.** Each row shows the focal family with its number of species (N), the estimate of D obtained after removing it, the % change from the value for the whole order, and the results from the randomization test. m.null.estimate is the mean value of the null distribution of estimates after 500 randomizations. Pval.randomization is the result of testing if the change in parameter estimate is significantly different from the null distribution.

| Clade removed   | N   | D     | Percent change | m.null.estimate | Pval.randomization |
|-----------------|-----|-------|----------------|-----------------|--------------------|
| Lepilemuridae   | 24  | 0.881 | 5.7            | 0.832           | 0.025              |
| Cheirogaleidae  | 28  | 0.859 | 3.1            | 0.830           | 0.135              |
| Atelidae        | 22  | 0.853 | 2.5            | 0.832           | 0.165              |
| Pitheciidae     | 18  | 0.813 | 2.4            | 0.831           | 0.190              |
| Hylobatidae     | 18  | 0.815 | 2.1            | 0.831           | 0.170              |
| Callitrichidae  | 29  | 0.823 | 1.2            | 0.833           | 0.328              |
| Galagidae       | 14  | 0.825 | 0.9            | 0.831           | 0.350              |
| Cercopithecidae | 120 | 0.827 | 0.8            | 0.827           | 0.495              |
| Lemuridae       | 21  | 0.826 | 0.8            | 0.830           | 0.415              |
| Indriidae       | 15  | 0.830 | 0.4            | 0.831           | 0.455              |
| Cebidae         | 12  | 0.830 | 0.3            | 0.831           | 0.463              |

## Supplementary References

1. Agoramoorthy, G. in *Faunal ecology and conservation of the great Indian desert* (Sivaperuman, C., Baqri, Q. H., Ramaswamy, G. & Naseema, M. eds.) 177–191 (Springer, 2009).
2. Aguiar, L. M. *et al.* Occurrence, local extinction and conservation of primates in the corridor of the Upper Paraná River, with notes on other mammals. *Rev. Bras. Zool.* **24**, 898–906 (2007).
3. Albert, A., Savini, T. & Huynen, M. C. Sleeping site selection and presleep behavior in wild pigtailed macaques. *Am. J. Primatol.* **73**, 1222–1230 (2011).
4. Altmann, J. & Muruthi, P. Differences in daily life between semiprovisioned and wild-feeding baboons. *Am. J. Primatol.* **15**, 213–221 (1988).
5. Ancrenaz, M., Lackman-Ancrenaz, I. & Mundy, N. Field observations of aye-ayes (*Daubentonia madagascariensis*) in Madagascar. *Folia Primatol.* **62**, 22–36 (1994).
6. Anderson, J., Rowcliffe, J. M. & Cowlshaw, G. Does the matrix matter? A forest primate in a complex agricultural landscape. *Biol. Conserv.* **135**, 212–222 (2007).
7. Anderson, J., Rowcliffe, J. M. & Cowlshaw, G. The Angola black-and-white colobus (*Colobus angolensis palliatus*) in Kenya: historical range contraction and current conservation status. *Am. J. Primatol.* **69**, 664–680 (2007).
8. Andriamandimbiarisoa, L. *et al.* Habitat corridor utilization by the gray mouse lemur, *Microcebus murinus*, in the littoral forest fragments of southeastern Madagascar. *Madag. Conserv. Dev.* **10**, 144–150 (2015).
9. Aristizábal-Borja, J., Pozo-Montuy, G., Pérez-Torres, J. & Serio-Silva, J. C. Anotaciones de la ecología alimentaria de monos aulladores negros en un fragmento con condiciones de hacinamiento (Balancán, Tabasco, México). *Univ. Sci.* **16**, 140–146 (2011).
10. Asensio, N., Arroyo-Rodríguez, V., Dunn, J. C. & Cristóbal-Azkarate, J. Conservation value of landscape supplementation for howler monkeys living in forest patches. *Biotropica* **41**, 768–773 (2009).
11. Azhar, B., Lindenmayer, D. B., Wood, J., Fischer, J. & Zakaria, M. Ecological impacts of oil palm agriculture on forest mammals in plantation estates and smallholdings. *Biodivers. Conserv.* **23**, 1175–1191 (2014).
12. Baker, L. R., Tanimola, A. A. & Olubode, O. S. Sacred populations of *Cercopithecus sclateri*: analysis of apparent population increases from census counts. *Am. J. Primatol.* **76**, 303–312 (2014).
13. Baranga, D., Basuta, G. I., Teichroeb, J. A. & Chapman, C. A. Crop raiding patterns of solitary and social groups of red-tailed monkeys on cocoa pods in Uganda. *Trop. Conserv. Sci.* **5**, 104–111 (2012).
14. Basabose, A. K. Ranging patterns of chimpanzees in a montane forest of Kahuzi,

- Democratic Republic of Congo. *Int. J. Primatol.* **26**, 33–54 (2005).
15. Baya, L. & Storch, I. Status of diurnal primate populations at the former settlement of a displaced village in Cameroon. *Am. J. Primatol.* **72**, 645–652 (2010).
  16. Bayart, F. & Simmen, B. Demography, range use, and behavior in black lemurs (*Eulemur macaco macaco*) at Ampasikely, northwest Madagascar. *Am. J. Primatol.* **67**, 299–312 (2005).
  17. Beisner, B. A. *et al.* Human–wildlife conflict: proximate predictors of aggression between humans and rhesus macaques in India. *Am. J. Phys. Anthropol.* **156**, 286–294 (2015).
  18. Benitez-Malvido, J. *et al.* The role of sex and age in the architecture of intrapopulation howler monkey-plant networks in continuous and fragmented rain forests. *PeerJ* **4**, e1809 (2016).
  19. Bernstein, I. S. *et al.* Differential effects of forest degradation on primate populations. *Primates* **17**, 401–411 (1976).
  20. Bessa, J., Sousa, C. & Hockings, K. J. Feeding ecology of chimpanzees (*Pan troglodytes verus*) inhabiting a forest-mangrove-savanna-agricultural matrix at Caiquene-Cadique, Cantanhez National Park, Guinea-Bissau. *Am. J. Primatol.* **77**, 651–665 (2015).
  21. Bhat, S. K., Nair, C. P. R. & Mathew, D. N. Mammalian pests of cocoa in South India. *Int. J. Pest Manage.* **27**, 297–302 (1981).
  22. Bicca-Marques, J. C. & Calegario-Marques, C. Locomotion of black howlers in a habitat with discontinuous canopy. *Folia Primatol.* **64**, 55–61 (1995).
  23. Bismark, M. in *Indonesian Primates* (Gursky-Doyen, S. & Supriatna, J. eds.) 217–233 (Springer, 2010).
  24. Blair, M. E. & Melnick, D. J. Scale-dependent effects of a heterogeneous landscape on genetic differentiation in the Central American squirrel monkey (*Saimiri oerstedii*). *PLoS One* **7**, e43027 (2012).
  25. Boulton, A. M., Horrocks, J. A. & Baulu, J. The barbados vervet monkey (*Cercopithecus aethiops sabaens*): changes in population size and crop damage, 1980–1994. *Int. J. Primatol.* **17**, 831–844 (1996).
  26. Boyle, S. A. & Smith, A. T. Behavioral modifications in northern bearded saki monkeys (*Chiropotes satanas chiropotes*) in forest fragments of central Amazonia. *Primates* **51**, 43 (2010).
  27. Boyle, S. A., Zartman, C. E., Spironello, W. R. & Smith, A. T. Implications of habitat fragmentation on the diet of bearded saki monkeys in central Amazonian forest. *J. Mammal.* **93**, 959–976 (2012).
  28. Bracebridge, C. E., Davenport, T. R., Mbofu, V. F. & Marsden, S. J. Is there a role for human-dominated landscapes in the long-term conservation management of the

- critically endangered kipunji (*Rungwecebus kipunji*)? *Int. J. Primatol.* **34**, 1122–1136 (2013).
29. Braza, F., Alvarez, F. & Azcarate, T. Behaviour of the red howler monkey (*Alouatta seniculus*) in the Llanos of Venezuela. *Primates* **22**, 459–473 (1981).
  30. Brotcorne, F. *et al.* The role of anthropic, ecological, and social factors in sleeping site choice by long-tailed macaques (*Macaca fascicularis*). *Am. J. Primatol.* **76**, 1140–1150 (2014).
  31. Campbell-Smith, G., Campbell-Smith, M., Singleton, I. & Linkie, M. Raiders of the lost bark: orangutan foraging strategies in a degraded landscape. *PLoS One* **6**, e20962 (2011).
  32. Canale, G. R. *et al.* Seed dispersal of threatened tree species by a critically endangered primate in a Brazilian hotspot. *Folia Primatol.* **87**, 123–140 (2016).
  33. Canale, G. R., Kierulff, M. C. M. & Chivers, D. J. in *Primates in fragments* (Marsh, L. K. & Chapman, C. A. eds.) 299–311 (Springer, 2013).
  34. Carretero-Pinzón, X. in *Primates in fragments* (Marsh, L. K. & Chapman, C. A. eds.) 159–182 (Springer, 2013).
  35. Carretero-Pinzón, X., Defler, T. R. & Ruiz-Garcia, M. in *Phylogeny, molecular population genetics, evolutionary biology and conservation of the Neotropical primates* (J., M. R.-G. & Shostell, M. eds.) 491–506 (Nova Science Publisher, 2016).
  36. Carvalho, J. S., Marques, T. A. & Vicente, L. Population status of *Pan troglodytes verus* in Lagoas de Cufada Natural Park, Guinea-Bissau. *PLoS One* **8**, e71527 (2013).
  37. Carvalho, J. S., Vicente, L. & Marques, T. A. Chimpanzee (*Pan troglodytes verus*) diet composition and food availability in a human-modified landscape at Lagoas de Cufada natural Park, Guinea-Bissau. *Int. J. Primatol.* **36**, 802–822 (2015).
  38. Castaño, J. H., Ramírez, D. C. & Botero, J. E. in *Primatología en Colombia: avances al principio del milenio* (Pereira-Bengoa, V., Stevenson, P. R., Bueno, M. L. & Nassar-Montoya, F., eds.) 69–90 (Fundación Universitaria San Martín, 2010).
  39. Chagas, R. R. D. & Ferrari, S. F. Habitat use by *Callicebus coimbrai* (Primates: Pitheciidae) and sympatric species in the fragmented landscape of the Atlantic Forest of southern Sergipe, Brazil. *Zool.* **27**, 853–860 (2010).
  40. Chapman, C. A. & Balcomb, S. R. Population characteristics of howlers: ecological conditions or group history. *Int. J. Primatol.* **19**, 385–403 (1998).
  41. Chapman, C. A. & Fedigan, L. M. Dietary differences between neighboring *Cebus capucinus* groups: local traditions, food availability or responses to food profitability? *Folia Primatol.* **54**, 177–186 (1990).
  42. Chapman, C. A. & Onderdonk, D. A. Forests without primates: primate/plant codependency. *Am. J. Primatol.* **45**, 127–141 (1998).



43. Chapman, C. A., Chapman, L. & Glander, K. E. Primate populations in northwestern Costa Rica: potential for recovery. *Primate Conserv.* **10**, 37–44 (1989).
44. Chapman, C. A., Chapman, L. J. & Wrangham, R. W. Ecological constraints on group size: an analysis of spider monkey and chimpanzee subgroups. *Behav. Ecol. Sociobiol.* **36**, 59–70 (1995).
45. Ciani, A. C. & Chiarelli, B. Age and sex differences in the feeding strategies of a free-ranging population of *Macaca mulatta* Zimmerman, 1788 (primates: Cercopithecidae), in Simla (India). *Monit. Zool. Ital. J. Zool.* **22**, 171–182 (1988).
46. Ciani, A. C. Intertroop agonistic behavior of a feral rhesus macaque troop ranging in town and forest areas in India. *Aggressive Behav.* **12**, 433–439 (1986).
47. Coss, R. G. & Ramakrishnan, U. Perceptual aspects of leopard recognition by wild bonnet macaques (*Macaca radiata*). *Behaviour* **137**, 315–335 (2000).
48. Coss, R. G., Marks, S. & Ramakrishnan, U. Early environment shapes the development of gaze aversion by wild bonnet macaques (*Macaca radiata*). *Primates* **43**, 217–222 (2002).
49. Coss, R. G., McCowan, B. & Ramakrishnan, U. Threat-related acoustical differences in alarm calls by wild bonnet macaques (*Macaca radiata*) elicited by python and leopard models. *Ethology* **113**, 352–367 (2007).
50. Culot, L., Lazo, F. J. J. M., Huynen, M. C., Poncin, P. & Heymann, E. W. Seasonal variation in seed dispersal by tamarins alters seed rain in a secondary rain forest. *Int. J. Primatol.* **31**, 553–569 (2010).
51. Culot, L., Mann, D. J., Muñoz Lazo, F. J., Huynen, M. C. & Heymann, E. W. Tamarins and dung beetles: an efficient diplochorous dispersal system in the Peruvian Amazonia. *Biotropica* **43**, 84–92 (2011).
52. Das, J., Biswas, J., Bhattacharjee, P. C. & Rao, S. S. in *The gibbons. Developments in primatology: progress and prospects* (Whittaker, D. & Lappan, S. eds.) 467–475 (Springer, 2009).
53. de Luna, G. A., García-Morera, Y. & Link, A. Behavior and ecology of the white-footed tamarin (*Saguinus leucopus*) in a fragmented landscape of Colombia: small bodied primates and seed dispersal in Neotropical forests. *Trop. Conserv. Sci.* **9**, 788–808 (2016).
54. DeGama-Blanchet, H. N. & Fedigan, L. M. in *New perspectives in the study of mesoamerican primates* (Estrada, A., Garber, P. A., Pavelka, M. M. & Luecke, L. eds.) 165–188 (Springer, 2006).
55. Dela, J. D. Impact of monkey-human relationships and habitat change on *Semnopithecus vetulus nestor* in human modified habitats. *J. Natl. Sci. Found. Sri* **39**, 365–382 (2011).
56. Dela, J. D. Seasonal food use strategies of *Semnopithecus vetulus nestor*, at Panadura and Piliyandala, Sri Lanka. *Int. J. Primatol.* **28**, 607–626 (2007).

57. Dib, L. R. T., Oliva, A. S. & Strier, K. B. Terrestrial travel in muriquis (*Brachyteles arachnoides*) across a forest clearing at the Estacao Biologica de Caratinga, Minas Gerais, Brazil. *Neotrop. Primates* **5**, 8–9 (1997).
58. Dorgay, E., Muelle, R. & Klooster, A. *Exploring possibilities for reforestation in southwestern Nicaragua: the social and ecological dimensions of living fence rows*. 97 (2016).
59. Duarte, M. H. & Young, R. J. Sleeping site selection by urban marmosets (*Callithrix penicillata*) under conditions of exceptionally high predator density. *Int. J. Primatol.* **32**, 329–334 (2011).
60. Duarte, M. H., Goulart, V. D. & Young, R. J. Designing laboratory marmoset housing: what can we learn from urban marmosets? *Appl. Anim. Behav. Sci.* **137**, 127–136 (2012).
61. Duarte, M. H., Vecchi, M. A., Hirsch, A. & Young, R. J. Noisy human neighbours affect where urban monkeys live. *Biol. Lett.* **7**, 840–842 (2011).
62. Duvall, C. S. Human settlement ecology and chimpanzee habitat selection in Mali. *Landscape Ecol.* **23**, 699 (2008).
63. Ekanayake, D. K., Rajapakse, R. P. V., Dubey, J. P. & Dittus, W. P. J. Seroprevalence of *Toxoplasma gondii* in wild toque macaques (*Macaca sinica*) at Polonnaruwa, Sri Lanka. *J. Parasitol.* **90**, 870–871 (2004).
64. Enari, H. & Sakamaki-Enari, H. Synergistic effects of primates and dung beetles on soil seed accumulation in snow regions. *Ecol. Res.* **29**, 653–660 (2014).
65. Eppley, T. M. *et al.* The use of an invasive species habitat by a small folivorous primate: implications for lemur conservation in Madagascar. *PLoS One* **10**, e0140981 (2015).
66. Ernest, M. M. Habitat quality and integrated connectivity analysis for *Callicebus oenanthe* in San Martin, Peru. (2015).
67. Eschmann, C., Moore, R. & Nekaris, K. A. I. Calling patterns of western purple-faced langurs (Mammalia Primates: Cercopithecoidea: *Trachypithecus vetulus nestor*) in a degraded human landscape in Sri Lanka. *Contrib. Zool.* **77**, 57–65 (2008).
68. Estrada, A. & Coates-Estrada, R. Tropical rain forest fragmentation and wild populations of primates at Los Tuxtlas, Mexico. *Int. J. Primatol.* **17**, 759–783 (1996).
69. Estrada, A. *et al.* in *New perspectives in the study of Mesoamerican primates* (Estrada, A., Garber, P. A., Pavelka, M. M. & Luecke, L. eds.) 437–470 (Springer, 2006).
70. Fam, S. D., Lee, B. P. Y.-H. & Shekelle, M. The conservation status of slow lorises *Nycticebus* spp. in Singapore. *Endanger. Species Res.* **25**, 69–77 (2014).
71. Fashing, P. J. Mortality trends in the African cherry (*Prunus africana*) and the implications for colobus monkeys (*Colobus guereza*) in Kakamega Forest, Kenya. *Biol.*

- Conserv.* **120**, 449–459 (2004).
72. Fedigan, L. M. & Jack, K. Neotropical primates in a regenerating Costa Rican dry forest: a comparison of howler and capuchin population patterns. *Int. J. Primatol.* **22**, 689–713 (2001).
  73. Fedigan, L. M., Fedigan, L., Chapman, C. A. & Glander, K. E. A census of *Alouatta palliata* and *Cebus capucinus* monkeys in Santa Rosa National Park, Costa Rica. *Brenesia.*, **23**, 309–322 (1985).
  74. Fedigan, L. M., Rose, L. M. & Avila, R. M. Growth of mantled howler groups in a regenerating Costa Rican dry forest. *Int. J. Primatol.* **19**, 405–432 (1998).
  75. Fehlmann, G., O’Riain, M. J., Kerr-Smith, C. & King, A. J. Adaptive space use by baboons (*Papio ursinus*) in response to management interventions in a human-changed landscape. *Anim. Conserv.* **20**, 101–109 (2017).
  76. Felton, A., Felton, A. M., Wallace, R. B. & Gómez, H. Identification, behavioral observations, and notes on the distribution of the titi monkeys *Callicebus modestus* and *Callicebus olallae*. *Primate Conserv.* **20**, 41–46 (2006).
  77. Ferrari, S. F. *et al.* in *Primates in fragments* (Marsh, L. K. ed.) 123–144 (Springer, 2003).
  78. Fimbel, C. Ecological correlates of species success in modified habitats may be disturbance- and site-specific: the primates of Tiwai Island. *Conserv. Biol.* **8**, 106–113 (1994).
  79. Fimbel, C. The relative use of abandoned farm clearings and old forest habitats by primates and a forest antelope at Tiwai, Sierra Leone, West Africa. *Biol. Conserv.* **70**, 277–286 (1994).
  80. Fleisher, K. M. The distribution, habitat use, and conservation status of three Atlantic forest monkeys (*Sapajus xanthosternos*, *Callicebus melanochir*, *Callithrix* sp.) in an agroforestry/forest mosaic in Southern Bahia, Brazil. *Int. J. Primatol.* **36**, 1172–1197 (2015).
  81. Freitas, C. H. D., Setz, E. Z., Araújo, A. R. & Gobbi, N. Agricultural crops in the diet of bearded capuchin monkeys, *Cebus libidinosus* Spix (Primates: Cebidae), in forest fragments in southeast Brazil. *Rev. Bras. Zool.* **25**, 32–39 (2008).
  82. Fuentes, A., Shaw, E. & Cortes, J. Qualitative assessment of macaque tourist sites in Padangtegal, Bali, Indonesia, and the upper rock nature reserve, Gibraltar. *Int. J. Primatol.* **28**, 1143–1158 (2007).
  83. Fungo, B., Eilu, G., Tweheyo, M. & Baranga, D. Forest disturbance and cropping mixtures influence crop raiding by red-tailed monkey and grey-cheeked mangabey around Mabira Forest Reserve, Uganda. *J. Ecol. Nat. Environ.* **5**, 14–23 (2013).
  84. Galat-Luong, A. in *Pirang. Ecological investigations in a forest island in the Gambia. Hambourg: stiftung walderhaltung in Africa and Bunderforschunsanstalt für forst und holzwirtschaft* (Ellenberg, H. et al. eds.) 187–207 (Warne Verlag, 1988).

85. Gandhi, A. Catch me if you can: monkey capture in Delhi. *Ethnography* **13**, 43–56 (2012).
86. Ganzhorn, J. U. & Schmid, J. Different population dynamics of *Microcebus murinus* in primary and secondary deciduous dry forests of Madagascar. *Int. J. Primatol.* **19**, 785–796 (1998).
87. Ganzhorn, J. U. A possible role of plantations for primate conservation in Madagascar. *Am. J. Primatol.* **12**, 205–215 (1987).
88. Garcia, J. E. & Mba, J. Distribution, status and conservation of primates in Monte Alen National Park, equatorial Guinea. *Oryx* **31**, 67–76 (1997).
89. Gibrail, M. M. *et al.* Detection of antibodies to Oropouche virus in non-human primates in Goiânia City, Goiás. *Rev. Soc. Bras. Med. Tro.* **49**, 357–360 (2016).
90. Gilbert, K. A. in *Primates in fragments* (Marsh, L. K. ed.) 145–157 (Springer, 2003).
91. Gilhooly, L. J., Rayadin, Y. & Cheyne, S. M. A comparison of hylobatid survey methods using triangulation on Müller’s gibbon (*Hylobates muelleri*) in Sungai Wain Protection Forest, East Kalimantan, Indonesia. *Int. J. Primatol.* **36**, 567–582 (2015).
92. Gippoliti, S. & Dell’Omo, G. Primates of the Cantanhez forest and the Cacine basin, Guinea-Bissau. *Oryx* **30**, 74–80 (1996).
93. Goldberg, T. L., Gillespie, T. R. & Rwego, I. B. in *Science and conservation in African forests: how long-term research promotes habitat protection* (Wrangham, R. & Ross, E. eds.) 75–87 (Cambridge University Press, 2008).
94. Goldberg, T. L., Gillespie, T. R., Rwego, I. B., Estoff, E. L. & Chapman, C. A. Forest fragmentation as cause of bacterial transmission among nonhuman primates, humans, and livestock, Uganda. *Emerg. Infect. Dis.* **14**, 1375 (2008).
95. Gómez-Marin, F. *et al.* Food resources and the survival of a group of howler monkeys (*Alouatta palliata mexicana*) in disturbed and restricted habitat at Los Tuxtlas, Veracruz, Mexico. *Neotrop. Primates* **9**, 60 (2001).
96. Gonzalez-Kirchner, J. P. & de la Maza, M. S. Primates hunting by *Guaymi* amerindians in Costa Rica. *Human Evolution* **13**, 15–19 (1998).
97. Goulart, V. D., Teixeira, C. P. & Young, R. J. Analysis of callouts made in relation to wild urban marmosets (*Callithrix penicillata*) and their implications for urban species management. *Eur. J. Wildlife Res.* **56**, 641–649 (2010).
98. Green, K. M. Primate censusing in northern Colombia: a comparison of two techniques. *Primates* **19**, 537–550 (1978).
99. Gupta, A. K. & Kumar, A. Feeding ecology and conservation of the Phayre’s leaf monkey *Presbytis phayrei* in northeast India. *Biol. Conserv.* **69**, 301–306 (1994).
100. Guzmán, A., Link, A., Castillo, J. A. & Botero, J. E. Agroecosystems and primate

conservation: shade coffee as potential habitat for the conservation of Andean night monkeys in the northern Andes. *Agric. Ecosyst. Environ.* **215**, 57–67 (2016).

101. Halloran, A. R., Cloutier, C. T., Monde, S. & Sesay, P. B. The tonkolili chimpanzee project in Sierra Leone: implications for chimpanzee conservation strategies in anthropogenic landscapes. *Afr. Primates* **9**, 15–22 (2014).
102. Hasan, M. K. *et al.* Distribution of rhesus macaques (*Macaca mulatta*) in Bangladesh: inter-population variation in group size and composition. *Primate Conserv.* **26**, 125–132 (2013).
103. Heiduck, S. The use of disturbed and undisturbed forest by masked titi monkeys *Callicebus personatus melanochir* is proportional to food availability. *Oryx* **36**, 133–(2002).
104. Henzi, S. P., Brown, L. R., Barrett, L. & Marais, A. J. Troop size, habitat use, and diet of chacma baboons (*Papio hamadryas ursinus*) in commercial pine plantations: implications for management. *Int. J. Primatol.* **32**, 1020–1032 (2011).
105. Hill, C. M. Conflict of interest between people and baboons: crop raiding in Uganda. *Int. J. Primatol.* **21**, 299–315 (2000).
106. Hill, C. M. Crop-raiding by wild vertebrates: the farmer’s perspective in an agricultural community in western Uganda. *Int. J. Pest Manage.* **43**, 77–84 (1997).
107. Hockings, K. J. & Sousa, C. Differential utilization of cashew—a low-conflict crop—by sympatric humans and chimpanzees. *Oryx* **46**, 375–381 (2012).
108. Hoffman, T. S. & O’Riain, M. J. Landscape requirements of a primate population in a human-dominated environment. *Front. Zool.* **9**, 1 (2012).
109. Hoffman, T. S. & O’Riain, M. J. Monkey management: using spatial ecology to understand the extent and severity of human–baboon conflict in the Cape Peninsula, South Africa. *Ecol. Soc.* **17**, 13 (2012).
110. Hoffman, T. S. & O’Riain, M. J. The spatial ecology of chacma baboons (*Papio ursinus*) in a human-modified environment. *Int. J. Primatol.* **32**, 308–328 (2011).
111. Hsu, M. J., Kao, C. C. & Agoramoorthy, G. Interactions between visitors and Formosan macaques (*Macaca cyclopis*) at Shou-Shan Nature Park, Taiwan. *Am. J. Primatol.* **71**, 214–222 (2009).
112. Imaki, H., Koganezawa, M. & Maruyama, N. Habitat selection and forest edge use by Japanese monkeys in the Nikko and Imaichi area, central Honshu, Japan. *Biosph. Conserv. Nature, Wildlife, Humans* **7**, 87–96 (2006).
113. Iwaki, T., Okada, T., Seki, K., Izawa, K. & Sakurai, F. *Ogmocotyle ailuri* (Price, 1954)(Digenea: Notocotylidae) found in the Japanese monkey, *Macaca fuscata*. *J. Vet. Med. Sci.* **74**, 1211–1212 (2012).
114. Jaman, M. F. & Huffman, M. A. The effect of urban and rural habitats and resource type on activity budgets of commensal rhesus macaques (*Macaca mulatta*) in

- Bangladesh. *Primates* **54**, 49–59 (2013).
115. Johns, A. G. & Johns, B. G. Tropical forest primates and logging: long-term coexistence? *Oryx* **29**, 205–211 (1995).
116. Jung, L., Mourthe, I., Grelle, C. E., Strier, K. B. & Boubli, J. P. Effects of local habitat variation on the behavioral ecology of two sympatric groups of brown howler monkey (*Alouatta clamitans*). *PLoS One* **10**, e0129789 (2015).
117. Kaplan, B. S., O’Riain, M. J., van Eeden, R. & King, A. J. A low-cost manipulation of food resources reduces spatial overlap between baboons (*Papio ursinus*) and humans in conflict. *Int. J. Primatol.* **32**, 1397–1412 (2011).
118. Kaplin, B. A. Ranging behavior of two species of guenons (*Cercopithecus lhoesti* and *C. mitis doggetti*) in the Nyungwe Forest Reserve, Rwanda. *Int. J. Primatol.* **22**, 521–548 (2001).
119. Karanth, K. U. & Sunquist, M. E. Population structure, density and biomass of large herbivores in the tropical forests of Nagarahole, India. *J. Trop. Ecol.* **8**, 21–35 (1992).
120. Kavanagh, M. Invasion of the forest by an African savannah monkey: behavioural adaptations. *Behaviour* **73**, 238–260 (1980).
121. Kifle, Z., Belay, G., & Bekele, A. Population size, group composition and behavioral ecology of geladas (*Theropithecus gelada*) and human-gelada conflict in Wonchit Valley, Ethiopia. *Pak. J. Biol. Sci.* **16**, 1248–1259 (2013).
122. Kool, K. M. The diet and feeding behavior of the silver leaf monkey (*Trachypithecus auratus sondaicus*) in Indonesia. *Int. J. Primatol.* **14**, 667–700 (1993).
123. Kulp, J. & Heymann, E. W. Ranging, activity budget, and diet composition of red titi monkeys (*Callicebus cupreus*) in primary forest and forest edge. *Primates* **56**, 273–278 (2015).
124. Kumar, R., Sinha, A. & Radhakrishna, S. Comparative demography of two commensal macaques in India: implications for population status and conservation. *Folia Primatol.* **84**, 384–393 (2013).
125. Kumar, V., Sankhyan, V. & Thakur, A. Ophthalmic diseases and disorders in free-ranging rhesus macaque (*Macaca mulatta*) of Shivalik hill area of Himachal Pradesh, Northern India. *J. Med. Primatol.* **44**, 89–96 (2015).
126. Kupsch, D., Waltert, M. & Heymann, E. W. Forest type affects prey foraging of saddleback tamarins, *Saguinus nigrifrons*. *Primates* **55**, 403–413 (2014).
127. Lacayo, G. Assessing silvery-brown tamarin (*Saguinus leucopus*) presence in four privately owned cattle ranches in Caldas, Colombia. *Canopy J. Primate Conserv.* **16**, 25–27 (2015).
128. LaFleur, M. & Gould, L. Feeding outside the forest: the importance of crop raiding and an invasive weed in the diet of gallery forest ring-tailed lemurs (*Lemur catta*) following a cyclone at the Beza Mahafaly Special Reserve, Madagascar. *Folia Primatol.* **80**, 233–246 (2009).

129. Lazo, F. J. J. M., Culot, L., Huynen, M. C. & Heymann, E. W. Effect of resting patterns of tamarins (*Saguinus fuscicollis* and *Saguinus mystax*) on the spatial distribution of seeds and seedling recruitment. *Int. J. Primatol.* **32**, 223–237 (2011).
130. Lees, A. C. & Peres, C. A. Conservation value of remnant riparian forest corridors of varying quality for Amazonian birds and mammals. *Conserv. Biol.* **22**, 439–449 (2008).
131. Lemessa, D., Hylander, K. & Hambäck, P. Composition of crops and land-use types in relation to crop raiding pattern at different distances from forests. *Agric. Ecosyst. Environ.* **167**, 71–78 (2013).
132. Lemos de Sá, R. M. Situacao de uma populacao de mono-carvoeiro, *Brachyteles arachnoides*, em fragmento de Mata Atlantica (MG), implicacoes para sua conservacao. (1988).
133. Lenz, B. B., Jack, K. M. & Spironello, W. R. Edge effects in the primate community of the biological dynamics of forest fragments project, Amazonas, Brazil. *Am. J. Phys. Anthropol.* **155**, 436–446 (2014).
134. Li, D. *et al.* Ranging of *Rhinopithecus bieti* in the Samage Forest, China. II. Use of land cover types and altitudes. *Int. J. Primatol.* **29**, 1147 (2008).
135. Li, Y. The effect of forest clear-cutting on habitat use in Sichuan snub-nosed monkey (*Rhinopithecus roxellana*) in Shennongjia Nature Reserve, China. *Primates* **45**, 69–72 (2004).
136. Liebsch, D. & Mikich, S. B. First record of *Eucalyptus spp.* bark-stripping by Brown-capuchin monkeys (*Sapajus nigritus*, Primates: Cebidae). *Ciência Florest.* **25**, 501–505 (2015).
137. Lindshield, S. M. in *Ethnoprimatology* (Dore, K. M., Riley, E. P. & A. Fuentes eds.) 351–369 (Cambridge University Press, 2016).
138. Lokschin, L. X., Rodrigo, C. P., Hallal Cabral, J. N. & Buss, G. Power lines and howler monkey conservation in Porto Alegre, Rio Grande do Sul, Brazil. *Neotrop. Primates* **14**, 76–80 (2007).
139. Luckett, J., Danforth, E., Linsenbardt, K. & Pruetz, J. Planted trees as corridors for primates at El Zota Biological Field Station, Costa Rica. *Neotrop. Primates* **12**, 143–146 (2004).
140. Lwanga, J. S. Spatial distribution of primates in a mosaic of colonizing and old growth forest at Ngogo, Kibale National Park, Uganda. *Primates* **47**, 230–238 (2006).
141. Maibeche, Y., Moali, A., Yahi, N. & Menard, N. Is diet flexibility an adaptive life trait for relictual and peri-urban populations of the endangered primate *Macaca sylvanus*? *PLoS One* **10**, e0118596 (2015).
142. Mallott, E. K. Influences of natural and anthropogenic landscape features on ranging patterns of white-faced capuchins (*Cebus capucinus*). *Am. J. Phys. Anthropol.* **147**,

201–202 (2012).

143. Marchal, V. & Hill, C. Primate crop-raiding: a study of local perceptions in four villages in North Sumatra, Indonesia. *Primate Conserv.* **24**, 107–116 (2009).
144. Martinez, B. T. & Razafindratsima, O. H. Frugivory and seed dispersal patterns of the red-ruffed lemur, *Varecia rubra*, at a forest restoration site in Masoala National Park, Madagascar. *Folia Primatol.* **85**, 228–243 (2014).
145. Mass, V. *et al.* Lemur bridges provide crossing structures over roads within a forested mining concession near Moramanga, Toamasina Province, Madagascar. *Conserv. Evid.* **8**, 11–18 (2011).
146. Massussi, J. A., Djieto-Lordon, C., Njiokou, F., Laveissière, C. & van der Ploeg, J. D. Influence of habitat and seasonal variation on wild mammal diversity and distribution with special reference to the *Trypanosoma brucei* gambiense host-reservoir in Bipindi (Cameroon). *Acta Trop.* **112**, 308–315 (2009).
147. Mathur, R. & Manohar, B. R. Density of *Macaca mulatta* and *Presbytis entellus* in the old city of Jaipur: a three year survey. *Appl. Anim. Behav. Sci.* **27**, 351–361 (1990).
148. Matthews, A. & Matthews, A. Survey of gorillas (*Gorilla gorilla gorilla*) and chimpanzees (*Pan troglodytes troglodytes*) in Southwestern Cameroon. *Primates* **45**, 15–24 (2004).
149. McCann, C. *et al.* in *Primates in fragments* (Marsh, L. K. ed.) 321–341 (Springer, 2003).
150. McKinney, T. A classification system for describing anthropogenic influence on nonhuman primate populations. *Am. J. Primatol.* **77**, 715–726 (2015).
151. McKinney, T. Anthropogenic change and primate predation risk: crested caracaras (*Caracara plancus*) attempt predation on mantled howler monkeys (*Alouatta palliata*). *Neotrop. Primates* **16**, 24–27 (2009).
152. McKinney, T. The effects of provisioning and crop-raiding on the diet and foraging activities of human-commensal white-faced capuchins (*Cebus capucinus*). *Am. J. Primatol.* **73**, 439–448 (2011).
153. McLennan, M. R. & Plumptre, A. J. Protected apes, unprotected forest: composition, structure and diversity of riverine forest fragments and their conservation value in Uganda. *Trop. Conserv. Sci.* **5**, 79–103 (2012).
154. McPherson, S. C., Brown, M. & Downs, C. T. Diet of the crowned eagle (*Stephanoaetus coronatus*) in an urban landscape: potential for human-wildlife conflict? *Urban Ecosyst.* **19**, 383–396 (2016).
155. Md-Zain, B. M. *et al.* A comprehensive population survey and daily activity budget on long-tailed macaques of Universiti Kebangsaan Malaysia. *J. Biol. Sci.* **10**, 608–615 (2010).
156. Mekonnen, A. *et al.* Newly discovered bale monkey populations in forest fragments in



- southern Ethiopia: evidence of crop raiding, hybridization with grivets, and other conservation threats. *Am. J. Primatol.* **74**, 423–432 (2012).
157. Méndez-Carvajal, P. G. Population size, distribution and conservation status of howler monkeys (*Alouatta coibensis trabeata*) and spider monkeys (*Ateles geoffroyi azuerensis*) on the Azuero Peninsula, Panama. *Primate Conserv.* **26**, 3–15 (2013).
158. Merker, S. & Yustian, I. Habitat use analysis of Dian's tarsier (*Tarsius diana*) in a mixed-species plantation in Sulawesi, Indonesia. *Primates* **49**, 161–164 (2008).
159. Merker, S., Yustian, I. & Mühlenberg, M. Responding to forest degradation: altered habitat use by Dian's tarsier *Tarsius diana* in Sulawesi, Indonesia. *Oryx* **39**, 189–195 (2005).
160. Mikich, S. B. & Liebsch, D. Assessment of food supplementation and surveillance as techniques to reduce damage caused by black capuchin monkeys *Sapajus nigritus* to forest plantations. *Curr. Zool.* **60**, 581–590 (2014).
161. Mikich, S. B. & Liebsch, D. Damage to forest plantations by tufted capuchins (*Sapajus nigritus*): too many monkeys or not enough fruits? *Forest Ecol. Manage.* **314**, 9–16 (2014).
162. Mohnot, S. M., Gadgil, M. & Makwana, S. C. On the dynamics of the hanuman langur populations of Jodhpur (Rajasthan, India). *Primates* **22**, 182–191 (1981).
163. Moore, R. S., Nekaris, K. A. I. & Eschmann, C. Habitat use by western purple-faced langurs *Trachypithecus vetulus nestor* (Colobinae) in a fragmented suburban landscape. *Endanger. Species Res.* **12**, 227–234 (2010).
164. Mulu, K. S. *Are the endemic and endangered Tana River primates culprits of crop raiding? Evaluating human–nonhuman primate conflict status around Tana river primate reserve, in Kenya.* 34 (2010).
165. Muñoz, D., Estrada, A., Naranjo, E. & Ochoa, S. Foraging ecology of howler monkeys in a cacao (*Theobroma cacao*) plantation in Comalcalco, Mexico. *Am. J. Primatol.* **68**, 127–142 (2006).
166. Narvaez-Rivera, G. Bridging the forest gap: an experimental evaluation of bridges for new world monkeys. in *Symposium on undergraduate research and creative expression* (2014).
167. Nasi, R., Koponen, P., Poulsen, J. G., Buitenzorgy, M. & Rusmantor, W. Impact of landscape and corridor design on primates in a large-scale industrial tropical plantation landscape. *Biodivers. Conserv.* **17**, 1105–1126 (2008).
168. Naughton-Treves, L. Predicting patterns of crop damage by wildlife around Kibale National Park, Uganda. *Conserv. Biol.* **12**, 156–168 (1998).
169. Neville, M. K. The population structure of red howler monkeys (*Alouatta seniculus*) in Trinidad and Venezuela. *Folia Primatol.* **17**, 56–86 (1972).
170. Nijman, V. Effects of habitat disturbance and hunting on the density and the biomass

- of the endemic Hose's leaf monkey *Presbytis hosei* (Thomas, 1889) (Mammalia: Primates: Cercopithecidae) in east Borneo. *Contrib. Zool.* **73**, 283–291 (2004).
171. Nijman, V. Geographic distribution of ebony leaf monkey *Trachypithecus auratus*. *Contrib. Zool.* **69**, 157–177 (2000).
172. Norscia, I. & Palagi, E. Berenty 2006: census of *Propithecus verreauxi* and possible evidence of population stress. *Int. J. Primatol.* **29**, 1099 (2008).
173. Nowak, K. & Lee, P. C. in *Primates in fragments. Complexity and resilience* (Marsh, L. K. & Chapman, C. A. eds.) 199–211 (Springer, 2013).
174. Oates, J. F. The diet of the olive colobus monkey, *Procolobus verus*, in Sierra Leone. *Int. J. Primatol.* **9**, 457–478 (1988).
175. Oberste, M. S. *et al.* Characterizing the picornavirus landscape among synanthropic nonhuman primates in Bangladesh, 2007–2008. *J. Virol.* **92**, 1–44 (2012).
176. Oliveira, L. C. & Dietz, J. M. Predation risk and the interspecific association of two Brazilian Atlantic forest primates in Cabruca agroforest. *Am. J. Primatol.* **73**, 852–860 (2011).
177. Oliveira, L. C., Neves, L. G., Raboy, B. E. & Dietz, J. M. Abundance of jackfruit (*Artocarpus heterophyllus*) affects group characteristics and use of space by golden-headed lion tamarins (*Leontopithecus chrysomelas*) in cabruca agroforest. *Environ. Manage.* **48**, 248–262 (2011).
178. Omar, A. & De Vos, A. Damage to exotic softwoods by Sykes monkeys (*Cercopithecus mitis* Kolbi Neuman). *E. Afr. Agr. Forestry J.* **35**, 323–330 (1970).
179. Onderdonk, D. A. & Chapman, C. A. Coping with forest fragmentation: the primates of Kibale National Park, Uganda. *Int. J. Primatol.* **21**, 587–611 (2000).
180. Oppenheimer, J. R. *Presbytis entellus*: birth in a free-ranging primate troop. *Primates* **17**, 541–542 (1976).
181. Papworth, S. & Mejia, M. Population density of Ecuadorian mantled howler monkeys (*Alouatta palliata aequatorialis*) in a tropical dry forest, with information on habitat selection, calling behavior and cluster sizes. *Stud. Neotrop. Fauna E.* **50**, 65–72 (2015).
182. Parker, L., Nijman, V. & Nekaris, K. A. I. When there is no forest left: fragmentation, local extinction, and small population sizes in the Sri Lankan western purple-faced langur. *Endanger. Species Res.* **5**, 29–36 (2008).
183. Parry, L., Barlow, J. & Peres, C. A. Large-vertebrate assemblages of primary and secondary forests in the Brazilian Amazon. *J. Trop. Ecol.* **23**, 653–662 (2007).
184. Parry, L., Barlow, J. O. S. & Peres, C. A. Hunting for sustainability in tropical secondary forests. *Conserv. Biol.* **23**, 1270–1280 (2009).
185. Patterson, L., Kalle, R. & Downs, C. Predation of artificial bird nests in suburban gardens of KwaZulu-Natal, South Africa. *Urban Ecosyst.* **19**, 615–630 (2016).

186. Pazol, K. & Cords, M. Seasonal variation in feeding behavior, competition and female social relationships in a forest dwelling guenon, the blue monkey (*Cercopithecus mitis stuhlmanni*), in the Kakamega Forest, Kenya. *Behav. Ecol. Sociobiol.* **58**, 566–577 (2005).
187. Pebsworth, P. A., MacIntosh, A. J., Morgan, H. R. & Huffman, M. A. Factors influencing the ranging behavior of chacma baboons (*Papio hamadryas ursinus*) living in a human-modified habitat. *Int. J. Primatol.* **33**, 872–887 (2012).
188. Pebsworth, P. A., Morgan, H. R. & Huffman, M. A. Evaluating home range techniques: use of Global Positioning System (GPS) collar data from chacma baboons. *Primates* **53**, 345–355 (2012).
189. Peng-Fei, F., Xue-Long, J. & Chang-Cheng, T. The critically endangered black crested gibbon *Nomascus concolor* on Wuliang Mountain, Yunnan, China: the role of forest types in the species' conservation. *Oryx* **43**, 203–208 (2009).
190. Pérez, L. & Pacheco, L. F. Wildlife damage mitigation in agricultural crops in a Bolivian montane forest. *Rev. Biol. Trop.* **62**, 1495–1507 (2014).
191. Perez-Elissetche, G. K. Suplementación dietética de monos araña (*Ateles geoffroyi*) en paisajes fragmentados (2015).
192. Pienkowski, M. W. *et al.* Temporal patterns of crop-raiding by primates: linking food availability in croplands and adjacent forest. *J. Appl. Ecol.* **35**, 596–606 (1998).
193. Pinto, L. P. S., Costa, C. M., Strier, K. B. & da Fonseca, G. A. Habitat, density and group size of primates in a Brazilian tropical forest. *Folia Primatol.* **61**, 135–143 (1993).
194. Pinzón, X. C. in *Primatología en Colombia: avances al principio del milenio* (Pereira-Bengoa, V., Stevenson, P. R., Bueno, M. L. & Nassar-Montoya, F. eds.) 91–97 (Fundación Universitaria San Martín, 2010).
195. Pirta, R. S. Maintenance of cooperative life in forest and urban rhesus monkeys (*Macaca mulatta*). *Proc. Anim. Sci.* **93**, 83–89 (1984).
196. Pozo-Montuy, G. & Serio-Silva, J. C. Movement and resource use by a group of *Alouatta pigra* in a forest fragment in Balancán, México. *Primates* **48**, 102–107 (2007).
197. Pozo-Montuy, G., Serio-Silva, J. C. & Bonilla-Sánchez, Y. M. Influence of the landscape matrix on the abundance of arboreal primates in fragmented landscapes. *Primates* **52**, 139–147 (2011).
198. Pozo-Montuy, G., Serio-Silva, J. C., Chapman, C. A. & Bonilla-Sánchez, Y. M. Resource use in a landscape matrix by an arboreal primate: evidence of supplementation in black howlers (*Alouatta pigra*). *Int. J. Primatol.* **34**, 714–731 (2013).
199. Priston, N. E. Exclosure plots as a mechanism for quantifying damage to crops by primates. *Int. J. Pest Manage.* **55**, 243–249 (2009).

200. Priston, N. E., Wyper, R. M. & Lee, P. C. Buton macaques (*Macaca ochreata brunnescens*): crops, conflict, and behavior on farms. *Am. J. Primatol.* **74**, 29–36 (2012).
201. Raboy, B. E., Christman, M. C. & Dietz, J. M. The use of degraded and shade cocoa forests by endangered golden-headed lion tamarins *Leontopithecus chrysomelas*. *Oryx* **38**, 75–83 (2004).
202. Ramakrishnan, U. & Coss, R. G. Recognition of heterospecific alarm vocalization by bonnet macaques (*Macaca radiata*). *J. Comp. Psychol.* **114**, 3 (2000).
203. Ramos-Fernández, G. & Ayala-Orozco, B. in *Primates in fragments: ecology and conservation* (Marsh, L. K. ed.) 191–209 (Springer, 2003).
204. Ramos-Fernández, G. *et al.* Lévy walk patterns in the foraging movements of spider monkeys (*Ateles geoffroyi*). *Behav. Ecol. Sociobiol.* **55**, 223–230 (2004).
205. Ramos-Fernández, G., Vick, L. G., Aureli, F., Schaffner, C. & Taub, D. M. Behavioral ecology and conservation status of spider monkeys in the Otoch Ma'ax Yetel Kooch protected area. *Neotrop. Primates* **11**, 157–160 (2003).
206. Rayadin, Y. & Spehar, S. N. Body mass of wild bornean orangutans living in human-dominated landscapes: implications for understanding their ecology and conservation. *Am. J. Phys. Anthropol.* **157**, 339–346 (2015).
207. Regmi, G. R., Nekaris, K. A. I., Kandel, K. & Nijman, V. Crop-raiding macaques: predictions, patterns and perceptions from Langtang National Park, Nepal. *Endanger. Species Res.* **20**, 217–226 (2013).
208. Riley, E. P. & Priston, N. E. Macaques in farms and folklore: exploring the human-nonhuman primate interface in Sulawesi, Indonesia. *Am. J. Primatol.* **72**, 848–854 (2010).
209. Rocancio, N., Rojas, W. & Estévez-Vinasco., J. Densidad poblacional y tamaño de grupo de *Saguinus leucopus* en parches de bosque en el departamento de Caldas, Colombia. *Neotrop. Primates* **15**, 63–67 (2008).
210. Rodrigues, N. N. & Martinez, R. A. Wildlife in our backyard: interactions between wied's marmoset *Callithrix kuhlii* (Primates: Callithrichidae) and residents of Ilheus, Bahia, Brazil. *Wildlife Biol.* **20**, 91–96 (2014).
211. Roscoe, C. J., de Silva, M. A., Hapuarachchi, N. C. & Krishantha, P. R. A new color morph of the southern purple-faced langur (*Semnopithecus vetulus vetulus*) from the rainforests of Southwestern Sri Lanka. *Primate Conserv.* **26**, 115–124 (2013).
212. Rosembaum, B. Population densities of Sulawesi crested black macaques on Bacan and Sulawesi: effects of habitat disturbances and hunting. *Am. J. Primatol.* **44**, 89–106 (1998).
213. Ross, C., Srivastava, A. & Pirta, R. S. Human influences on the population density of Hanuman langurs *Presbytis entellus* and rhesus macaques *Macaca mulatta* in Shimla,

- India. *Biol. Conserv.* **65**, 159–163 (1993).
214. Rowell, T. E. Forest living baboons in Uganda. *J. Zool.* **149**, 344–364 (1966).
215. Rudran, R., Dayananda, H. G. S. K., Jayamanne, D. D. & Sirimanne, D. G. R. Food habits and habitat use patterns of Sri Lanka's western purple-faced langur. *Primate Conserv.* **27**, 99–108 (2013).
216. Russon, A. E., Kuncoro, P. & Ferisa, A. Orangutan behavior in Kutai National Park after drought and fire damage: adjustments to short-and long-term natural forest regeneration. *Am. J. Primatol.* **77**, 1276–1289 (2015).
217. Ryan, S. J. & Hartter, J. Beyond ecological success of corridors: integrating land use history and demographic change to provide a whole landscape perspective. *Ecol. Restor.* **30**, 320–328 (2012).
218. Ryan, S. J. *et al.* A survey of gastrointestinal parasites of olive baboons (*Papio anubis*) in human settlement areas of Mole National Park, Ghana. *J. Parasitol.* **98**, 885–888 (2012).
219. Saikia, N. Status of sympatric langurs in a tea plantation in Barak valley, Assam, India. *Conserv. Rev.* **5**, 1 (2014).
220. Saj, T. L., Sicotte, P. & Paterson, J. D. The conflict between vervet monkeys and farmers at the forest edge in Entebbe, Uganda. *Afr. J. Ecol.* **39**, 195–199 (2001).
221. Sakamaki, H., Enari, H., Aoi, T. & Kunisaki, T. Winter food abundance for Japanese monkeys in differently aged Japanese cedar plantations in snowy regions. *Mamm. Study* **36**, 1–10 (2011).
222. Scheun, J., Bennett, N. C., Ganswindt, A. & Nowack, J. The hustle and bustle of city life: monitoring the effects of urbanisation in the African lesser bushbaby. *Sci. Nat.* **102**, 57 (2015).
223. Schleuning, M. *et al.* Specialization and interaction strength in a tropical plant-fruitivore network differ among forest strata. *Ecology* **92**, 26–36 (2011).
224. Schwitzer, N. *et al.* Parasite prevalence in blue-eyed black lemurs *Eulemur flavifrons* in differently degraded forest fragments. *Endanger. Species Res.* **12**, 215–225 (2010).
225. Sha, J. C. M. *et al.* Status of the long-tailed macaque *Macaca fascicularis* in Singapore and implications for management. *Biodivers. Conserv.* **18**, 2909–2926 (2009).
226. Singh, M. & Rao, N. R. Population dynamics and conservation of commensal bonnet macaques. *Int. J. Primatol.* **25**, 847–859 (2004).
227. Singh, M. & Vinathe, S. Inter-population differences in the time budgets of bonnet monkeys (*Macaca radiata*). *Primates*, **31**, 589–596 (1990).
228. Singh, M., Erinjery, J. J., Kavana, T. S., Roy, K. & Singh, M. Drastic population decline and conservation prospects of roadside dark-bellied bonnet macaques (*Macaca radiata radiata*) of southern India. *Primates* **52**, 149–154 (2011).

229. Slocum, M. G. & Horvitz, C. C. Seed arrival under different genera of trees in a neotropical pasture. *Plant Ecol.* **149**, 51–62 (2000).
230. Sorensen, T. C. & Fedigan, L. M. Distribution of three monkey species along a gradient of regenerating tropical dry forest. *Biol. Conserv.* **92**, 227–240 (2000).
231. Southwick, C. H. & Siddiqi, M. F. Primate commensalism: the rhesus monkey in India. in *XIVe congrès de la Société internationale de Primatologie* (Société nationale de protection de la nature et d'acclimatation de France, Paris (FRA), 1994).
232. Southwick, C. H., Beg, M. A. & Siddiqi, M. R. A population survey of rhesus monkeys in villages, towns and temples of northern India. *Ecology* **42**, 538–547 (1961).
233. Southwick, C. H., Siddiqi, M. F., Farooqui, M. Y. & Pal, B. C. Effects of artificial feeding on aggressive behaviour of rhesus monkeys in India. *Anim. Behav.* **24**, 11–15 (1976).
234. Stoner, K. E. Prevalence and intensity of intestinal parasites in mantled howling monkeys (*Alouatta palliata*) in Northeastern Costa Rica: implications for conservation biology. *Conserv. Biol.* **10**, 539–546 (1996).
235. Struhsaker, T. T. Ecology of vervet monkeys (*Cercopithecus aethiops*) in The Masai-Amboseli Game Reserve, Kenya. *Ecology* **48**, 891–904 (1967).
236. Teichroeb, J. A., Kutz, S. J., Parkar, U., Thompson, R. C. & Sicotte, P. Ecology of the gastrointestinal parasites of *Colobus vellerosus* at Boabeng-Fiema, Ghana: possible anthrozoootic transmission. *Am. J. Phys. Anthropol.* **140**, 498–507 (2009).
237. Teixeira, B. *et al.* Good neighbours: distribution of black-tufted marmoset (*Callithrix penicillata*) in an urban environment. *Wildl. Res.* **42**, 579–589 (2015).
238. Teixeira, F. Z., Printes, R. C., Fagundes, J. C. G., Alonso, A. C. & Kindel, A. Canopy bridges as road overpasses for wildlife in urban fragmented landscapes. *Biota Neotrop.* **13**, 117–123 (2013).
239. Thomas, S. C. Population densities and patterns of habitat use among anthropoid primates of the Ituri Forest, Zaire. *Biotropica* **23**, 68–83 (1991).
240. Tisovec, K. C., Cassano, C. R., Boubli, J. P. & Pardini, R. Mixed-species groups of marmosets and tamarins across a gradient of agroforestry intensification. *Biotropica* **46**, 248–255 (2014).
241. Tweheyo, M., Hill, C. M. & Obua, J. Patterns of crop raiding by primates around the Budongo Forest Reserve, Uganda. *Wildlife Biol.* **11**, 237–247 (2005).
242. Urquiza-Haas, T., Peres, C. A. & Dolman, P. M. Regional scale effects of human density and forest disturbance on large-bodied vertebrates throughout the Yucatán Peninsula, Mexico. *Biol. Conserv.* **142**, 134–148 (2009).
243. Valença-Silva, G. *et al.* Reporting social behaviours of mixed-species troops formed by *Callithrix jacchus* and *Callithrix penicillata* (Primate, Callitrichidae). *Braz. J. Biol.* **74**, 607–611 (2014).

244. Valladares-Padua, C., Cullen, J. L. & Padua, S. A pole bridge to avoid primate road kills. *Neotrop. Primates* **3**, 13–15 (1995).
245. Voskamp, A., Rode, E. J., Coudrat, C. N., Wilson, R. J. & Nekaris, K. A. I. Modelling the habitat use and distribution of the threatened Javan slow loris *Nycticebus javanicus*. *Endanger. Species Res.* **23**, 277–286 (2014).
246. Vulinec, K., Lambert, J. E. & Mellow, D. J. Primate and dung beetle communities in secondary growth rain forests: implications for conservation of seed dispersal systems. *Int. J. Primatol.* **27**, 855–879 (2006).
247. Waite, T. A., Chhangani, A. K., Campbell, L. G., Rajpurohit, L. S. & Mohnot, S. M. Sanctuary in the city: urban monkeys buffered against catastrophic die-off during ENSO-related drought. *Ecohealth* **4**, 278–286 (2007).
248. Wallace, G. E. & Hill, C. M. Crop damage by primates: quantifying the key parameters of crop-raiding events. *PLoS One* **7**, e46636, doi: 10.1371/journal.pone.0046636 (2012).
249. Wenz, A., Heymann, E. W., Petney, T. N. & Taraschewski, H. F. The influence of human settlements on the parasite community in two species of Peruvian tamarin. *Parasitology* **137**, 675–684 (2010).
250. Wiafe, E. D. & Arku, F. S. Victims' perspectives of lowe's monkeys' (*Cercopithecus campbelli lowei*) crop raiding events in Ghana: a case of Buabeng-Fiema Monkey Sanctuary. *J. Biodivers. Environ. Sci.* **2**, 1–8 (2012).
251. Wieczkowski, J. & Kinnaird, M. Shifting forest composition and primate diets: a 13-year comparison of the Tana River mangabey and its habitat. *Am. J. Primatol.* **70**, 339–348 (2008).
252. Williams, H. E. & Vaughan, C. White-faced monkey (*Cebus capucinus*) ecology and management in Neotropical agricultural landscapes during the dry season. *Rev. Biol. Trop.* **49**, 1199–1206 (2001).
253. Williams-Guillén, K., McCann, C., Martínez Sánchez, J. C. & Koontz, F. Resource availability and habitat use by mantled howling monkeys in a Nicaraguan coffee plantation: can agroforests serve as core habitat for a forest mammal? *Anim. Conserv.* **9**, 331–338 (2006).
254. Williams-Guillén, K., Otterstrom, S. M. & Gomez, C. *Assessment of fragmented landscapes as habitat for the Central American spider monkey (Ateles geoffroyi) in southwestern Nicaragua.* 18 (2008).
255. Xiang, Z. F., Huo, S. & Xiao, W. Habitat selection of black-and-white snub-nosed monkeys (*Rhinopithecus bieti*) in Tibet: implications for species conservation. *Am. J. Primatol.* **73**, 347–355 (2011).
256. Yamada, A. & Muroyama, Y. Effects of vegetation type on habitat use by crop-raiding Japanese macaques during a food-scarce season. *Primates* **51**, 159–166 (2010).

257. Yamagiwa, J., Mwanza, N., Yumoto, T. & Maruhashi, T. Ant eating by eastern lowland gorillas. *Primates* **32**, 247–253 (1991).
258. Zárate, D. A., Andresen, E., Estrada, A. & Serio-silva, J. C. Black howler monkey (*Alouatta pigra*) activity, foraging and seed dispersal patterns in shaded cocoa plantations versus rainforest in southern Mexico. *Am. J. Primatol.* **76**, 890–899 (2014).
